# Supplementary material for: New Piperazine Derivatives of 6-Acetyl-7-hydroxy-4-methylcoumarin as 5-HT1A Receptor Agents
Source: MDPI journal article supplement (doi:10.3390/ijms24032779), 2023-02-01

# New Piperazine Derivatives of 6-Acetyl-7-hydroxy-4-methylcoumarin as 5-HT<sub>1A</sub> Receptor Agents

Kinga Ostrowska <sup>1,\*</sup>, Anna Leśniak <sup>2</sup>, Weronika Gryczka <sup>1</sup>, Łukasz Dobrzycki <sup>3</sup>, Magdalena Bujalska-Zadrozny <sup>2</sup> and Bartosz Trzaskowski <sup>4</sup>

<sup>1</sup> Department of Organic and Physical Chemistry, Faculty of Pharmacy, Medical University of Warsaw, 1 Banacha Str., 02-097 Warsaw, Poland

<sup>2</sup> Centre for Preclinical Research and Technology, Department of Pharmacodynamics, Faculty of Pharmacy, Medical University of Warsaw, 1 Banacha Str., 02-97 Warsaw, Poland

<sup>3</sup> Crystallochemistry Laboratory, Chemistry Department, Warsaw University, 1 Pasteura Str., 02-093 Warsaw, Poland

<sup>4</sup> Centre of New Technologies, University of Warsaw, 2C Banacha Str., 02-097 Warsaw, Poland

\* Correspondence: kostrowska@wum.edu.pl; Tel.: +48-22-572-0669

KO-510A-1H-cdcl3  
KO 510A 1H w CDCl3

8.07

7.28

6.86

6.20  
6.19

4.21  
4.19  
4.17

3.54  
3.52  
3.50

2.67  
2.60  
2.45  
2.45  
2.13  
2.12  
2.11  
2.10

1.66

1.26

A

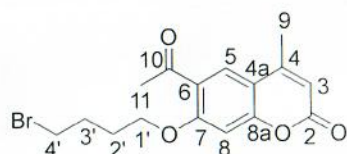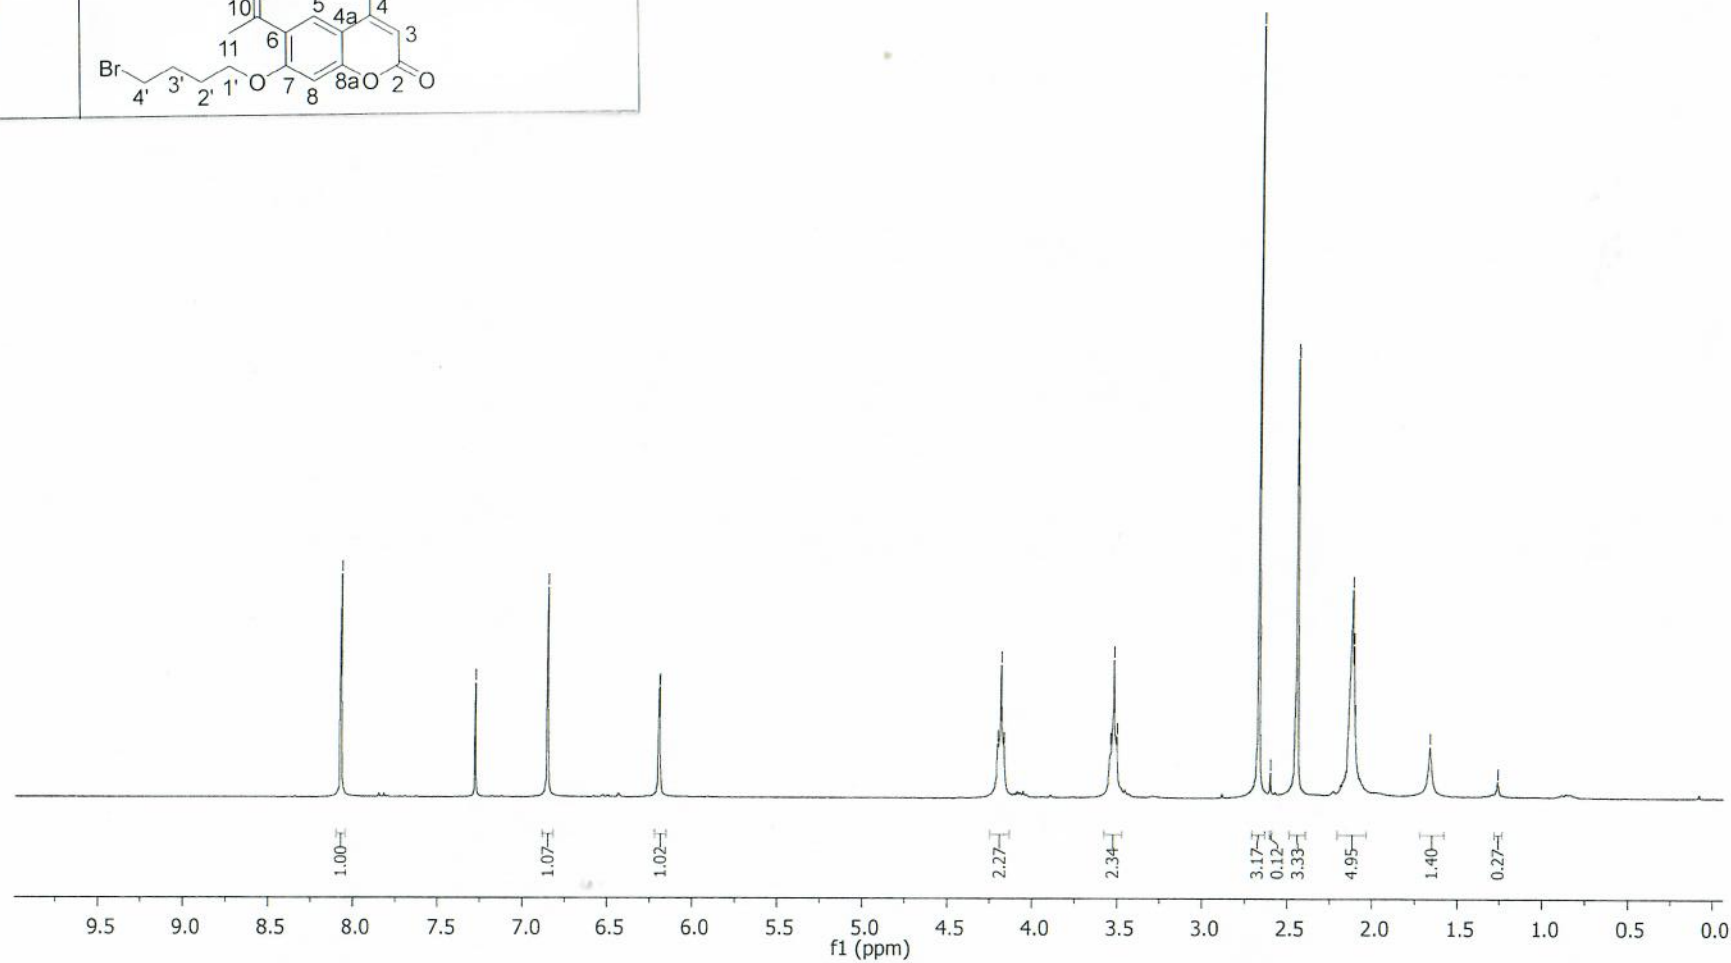

KO-510A-13C  
 KO-510A 13C w CDCl3

— 197.67

161.04  
 160.45  
 157.65  
 152.94

— 128.13  
 — 124.95

113.55  
 112.96

— 100.47

77.65  
 77.23  
 76.81  
 — 68.60

33.11  
 32.31  
 29.51  
 27.75  
 — 18.86

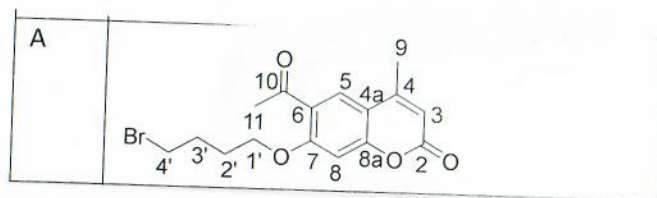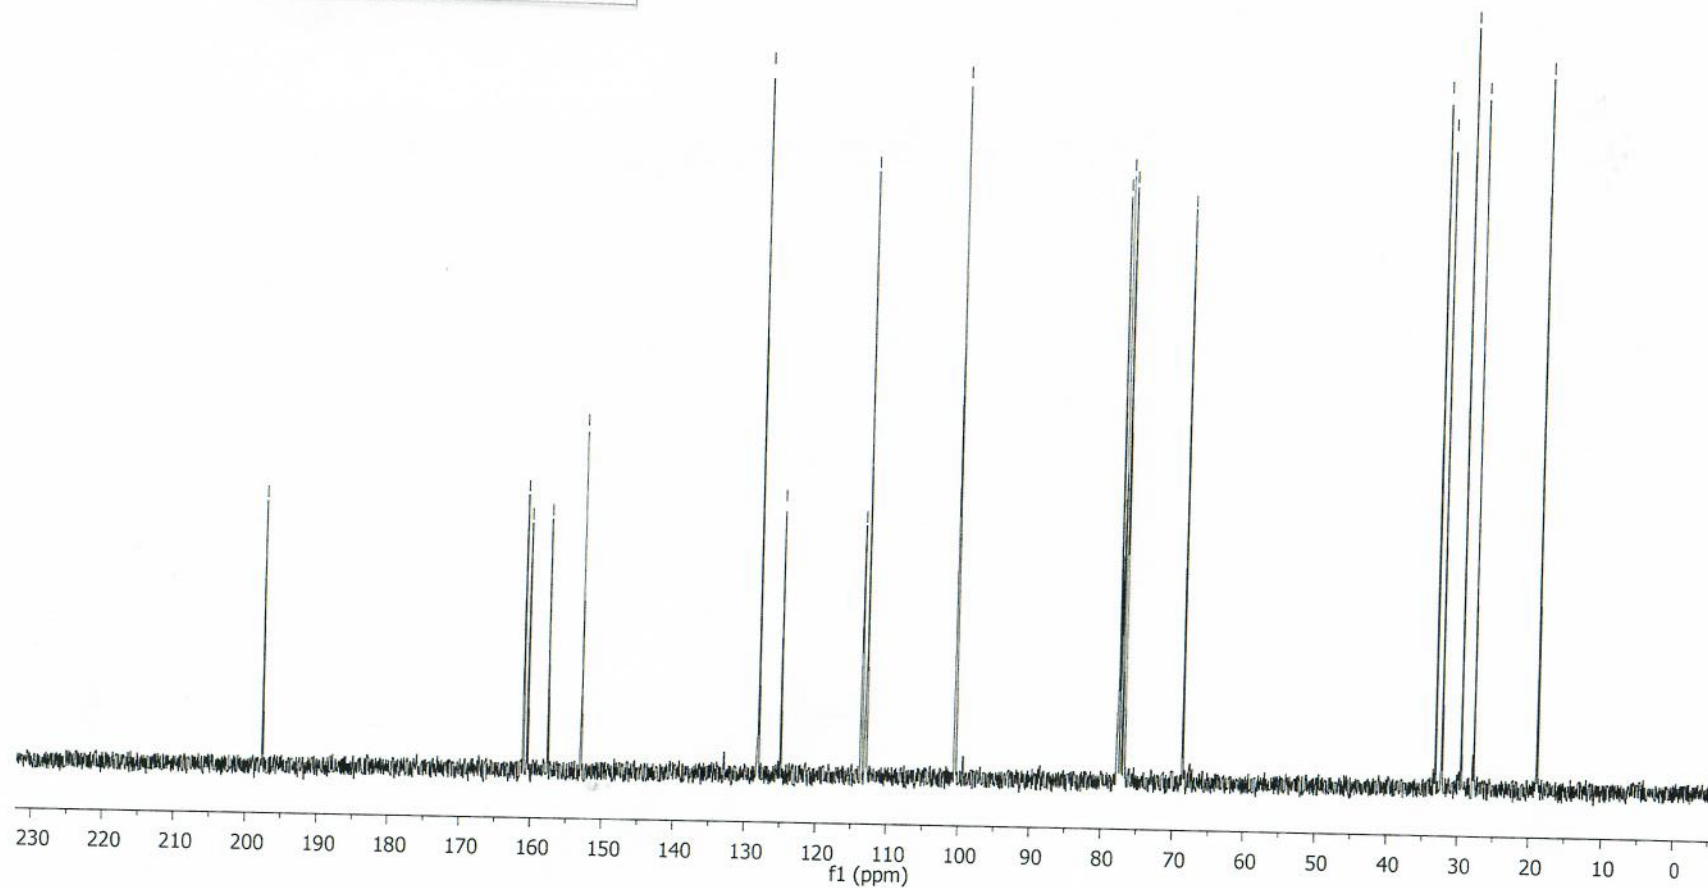

KO-511-I-1H-cdd3  
 KO 511 I 1H w CDCl3

1

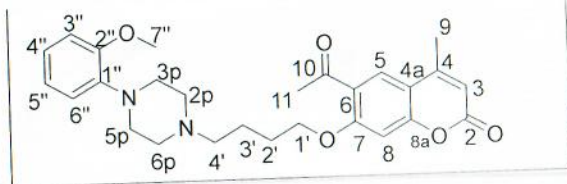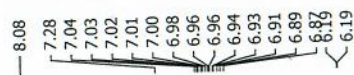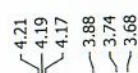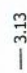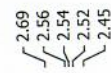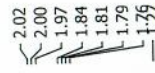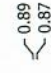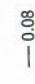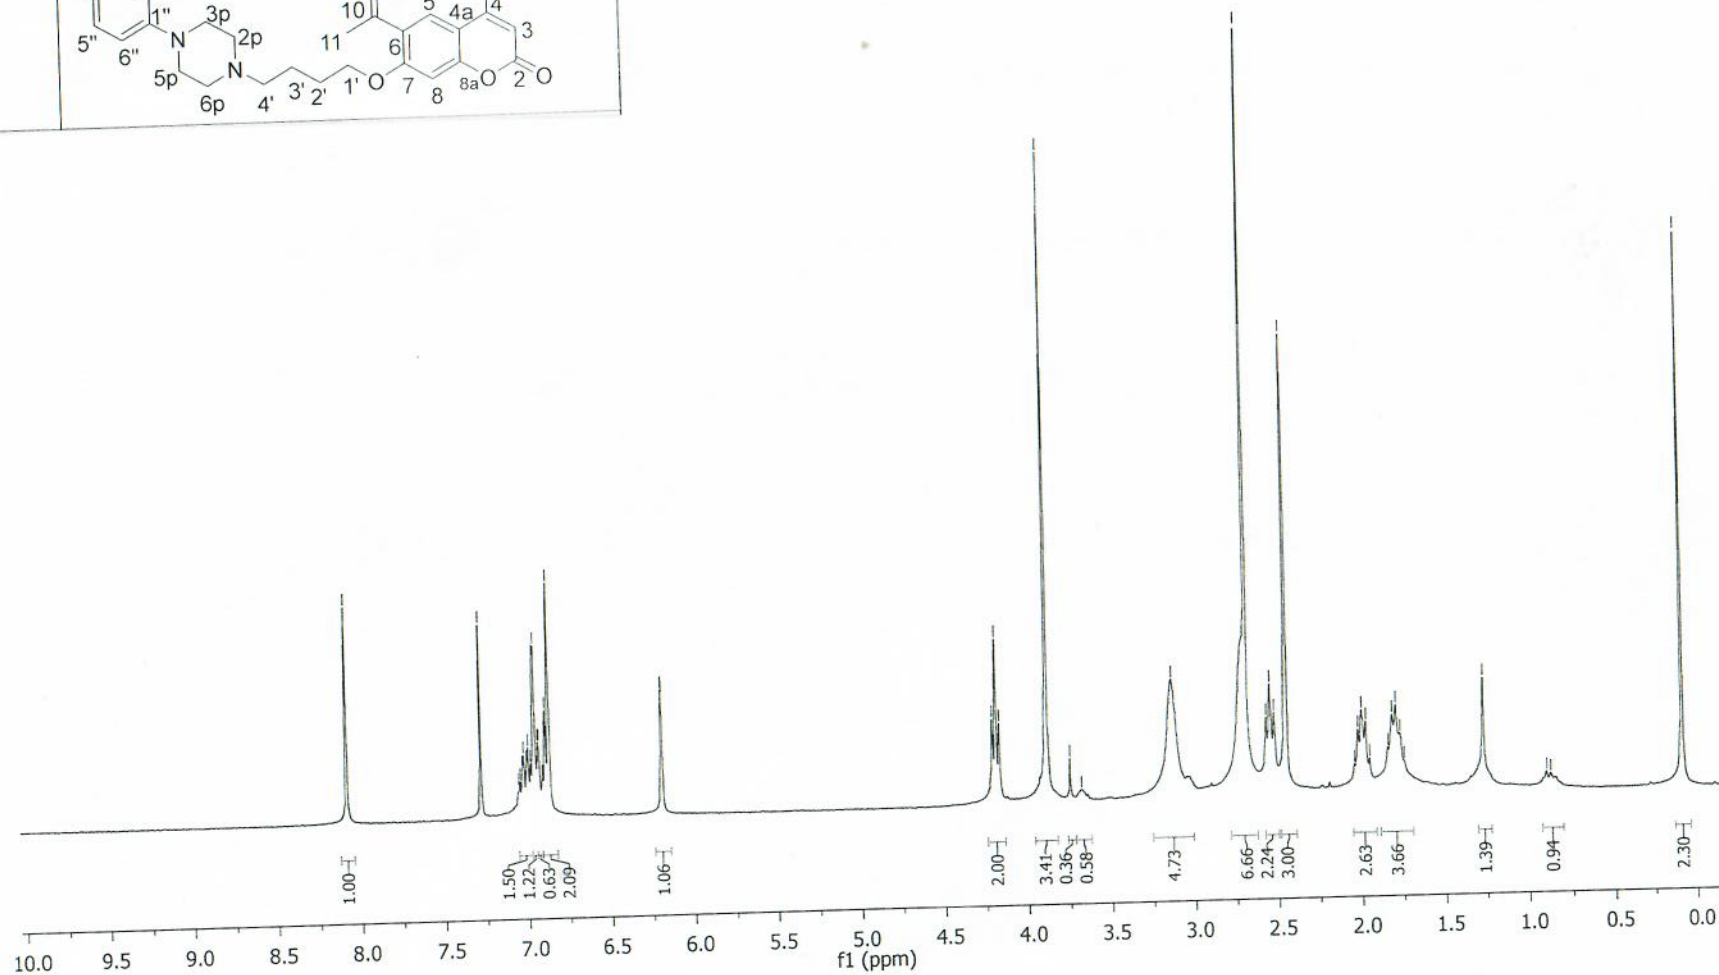

KO-511-I-13C

— 197.91

161.34  
160.62  
157.78  
153.04  
152.40

— 141.28

128.19  
125.03  
123.25  
121.17  
118.42  
113.53  
112.96  
111.27

— 100.57

77.65  
77.23  
76.81  
— 69.48

58.30  
55.55  
53.63  
50.82  
50.67

32.40  
29.92  
27.18  
23.57  
18.95

— 1.24

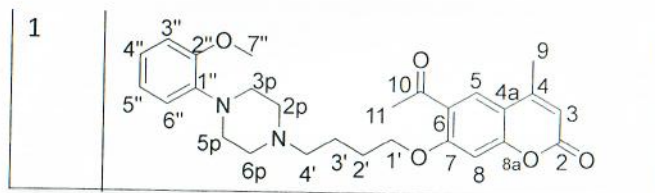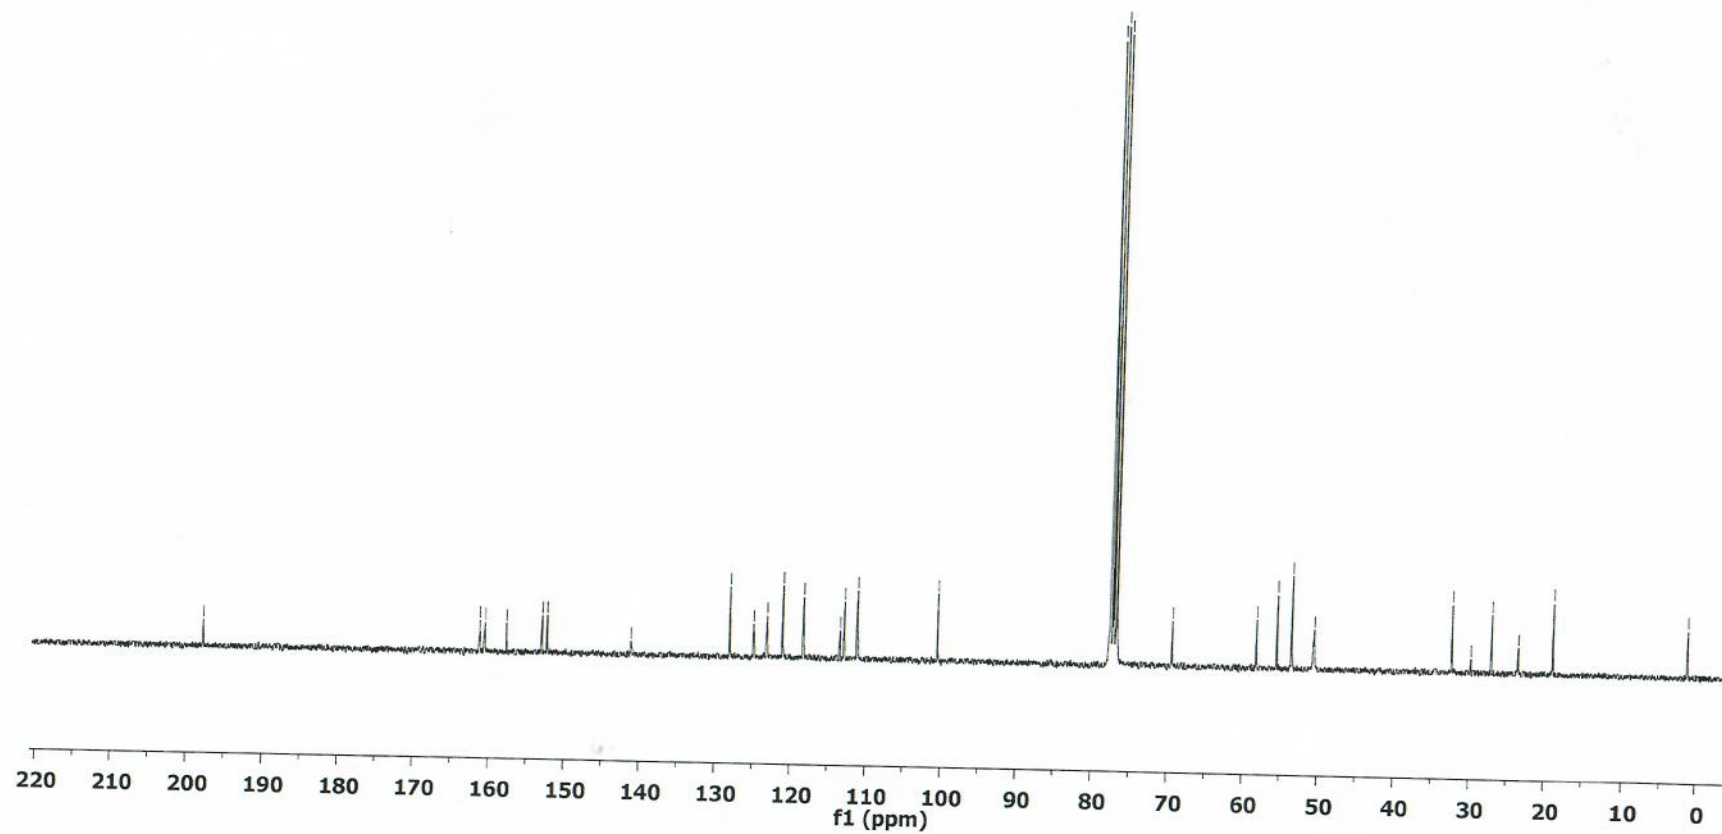

KO-518A

2

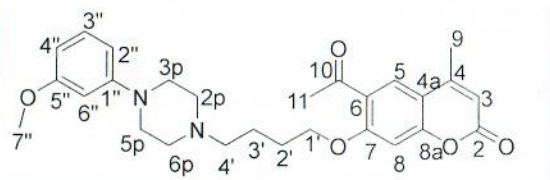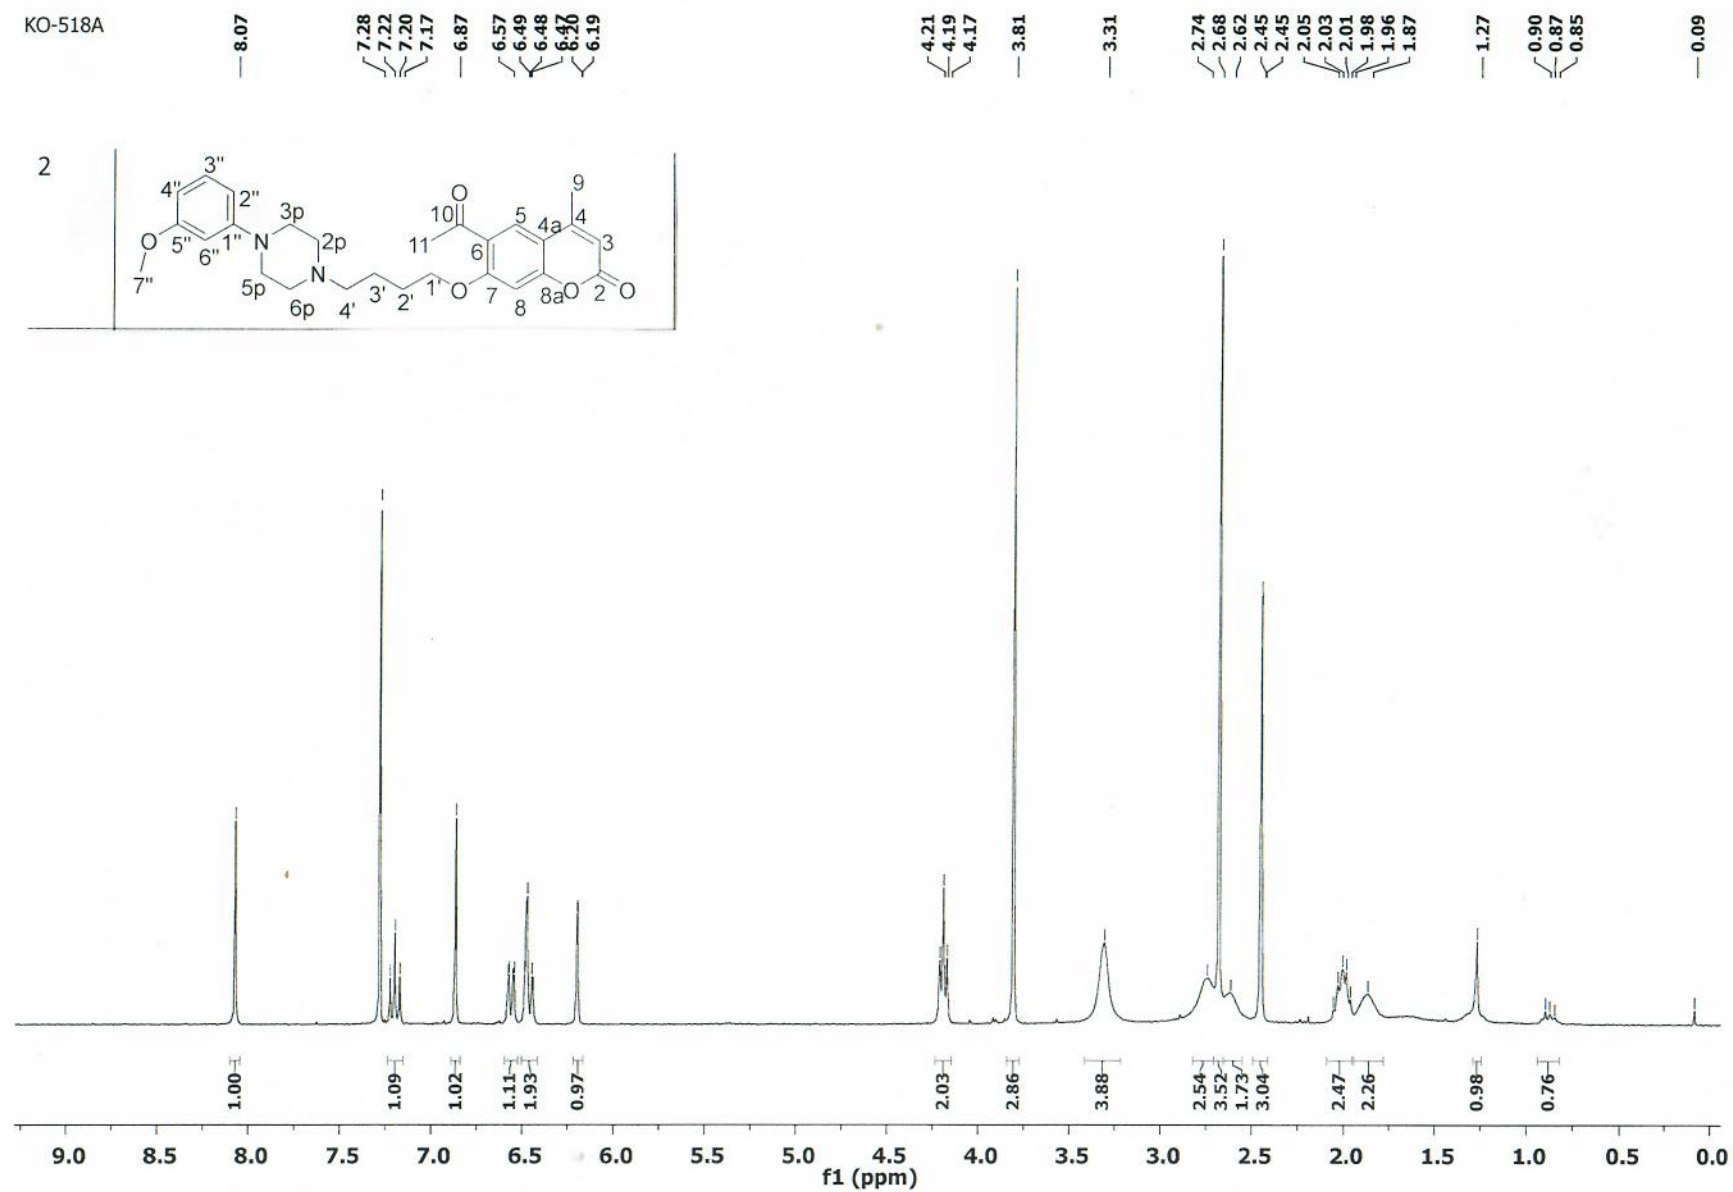

KO-518A-13C

— 197.82

161.08  
160.79  
160.56  
157.72  
152.96

130.15  
128.14  
125.09

113.61  
113.06  
109.37  
105.37  
103.14  
100.60

77.65  
77.23  
76.81  
— 69.15

57.88  
55.43  
52.92  
48.49  
48.32

— 32.29

— 26.95

— 18.94

2

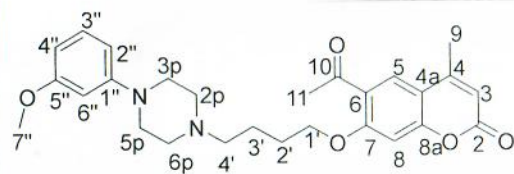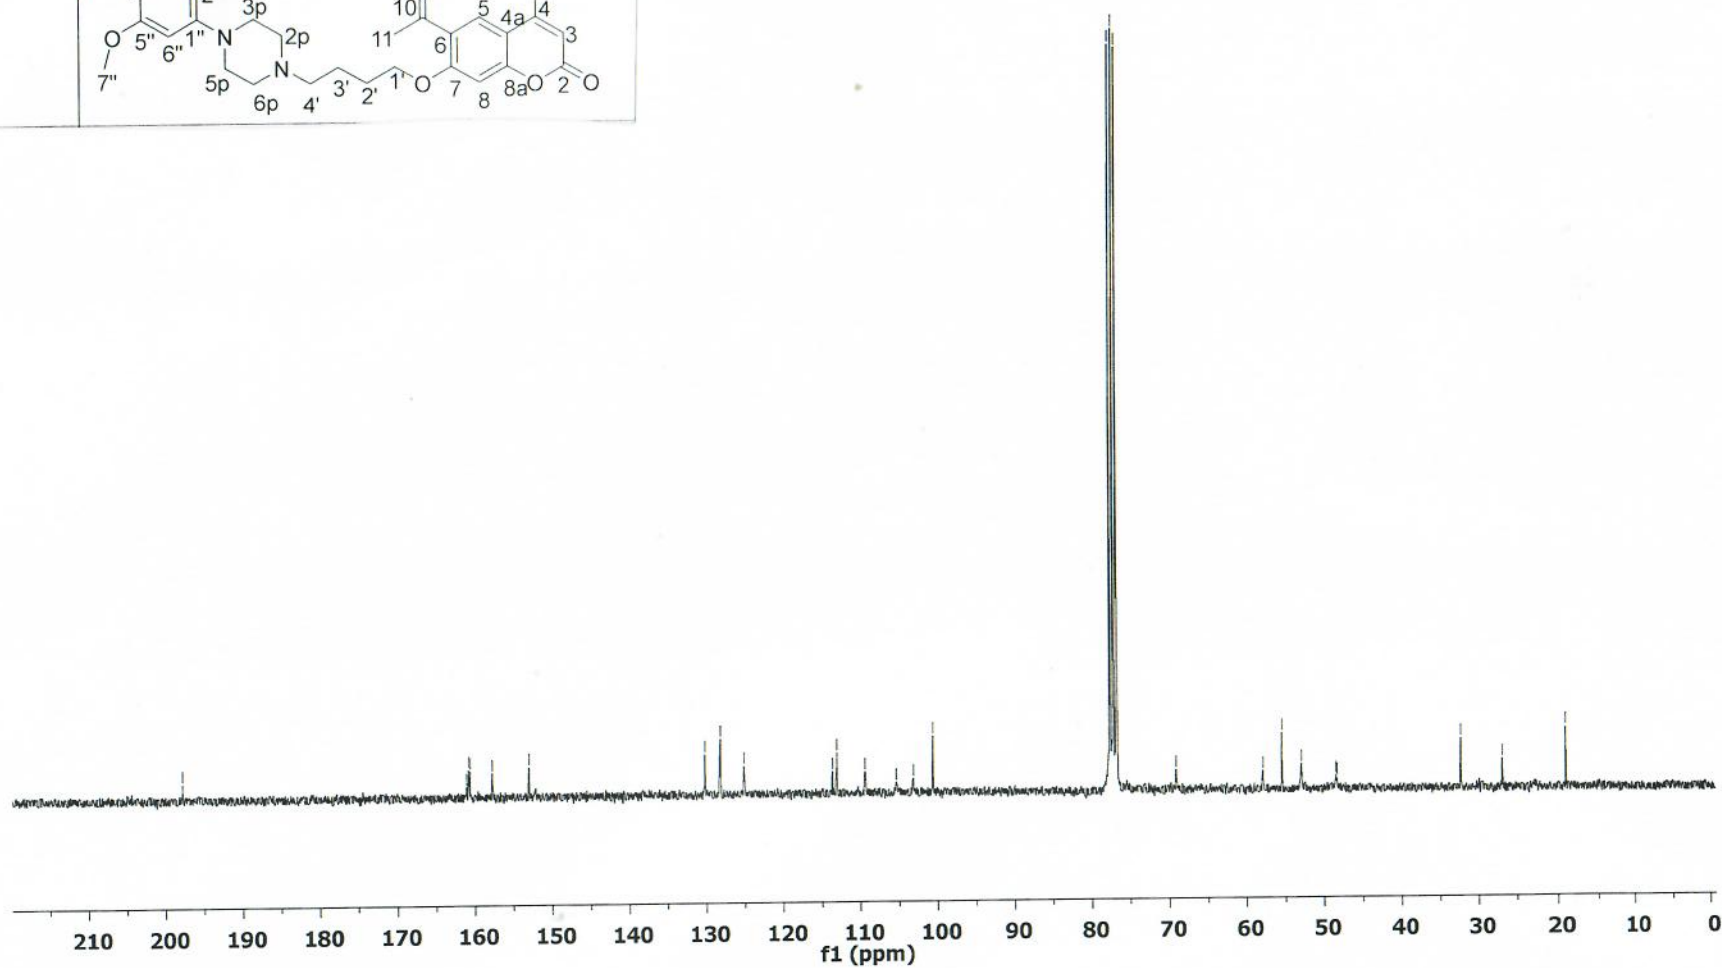

3

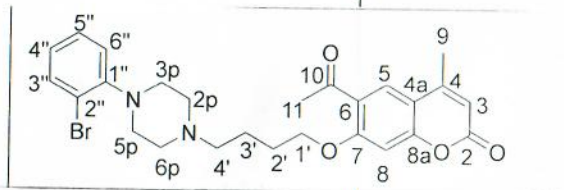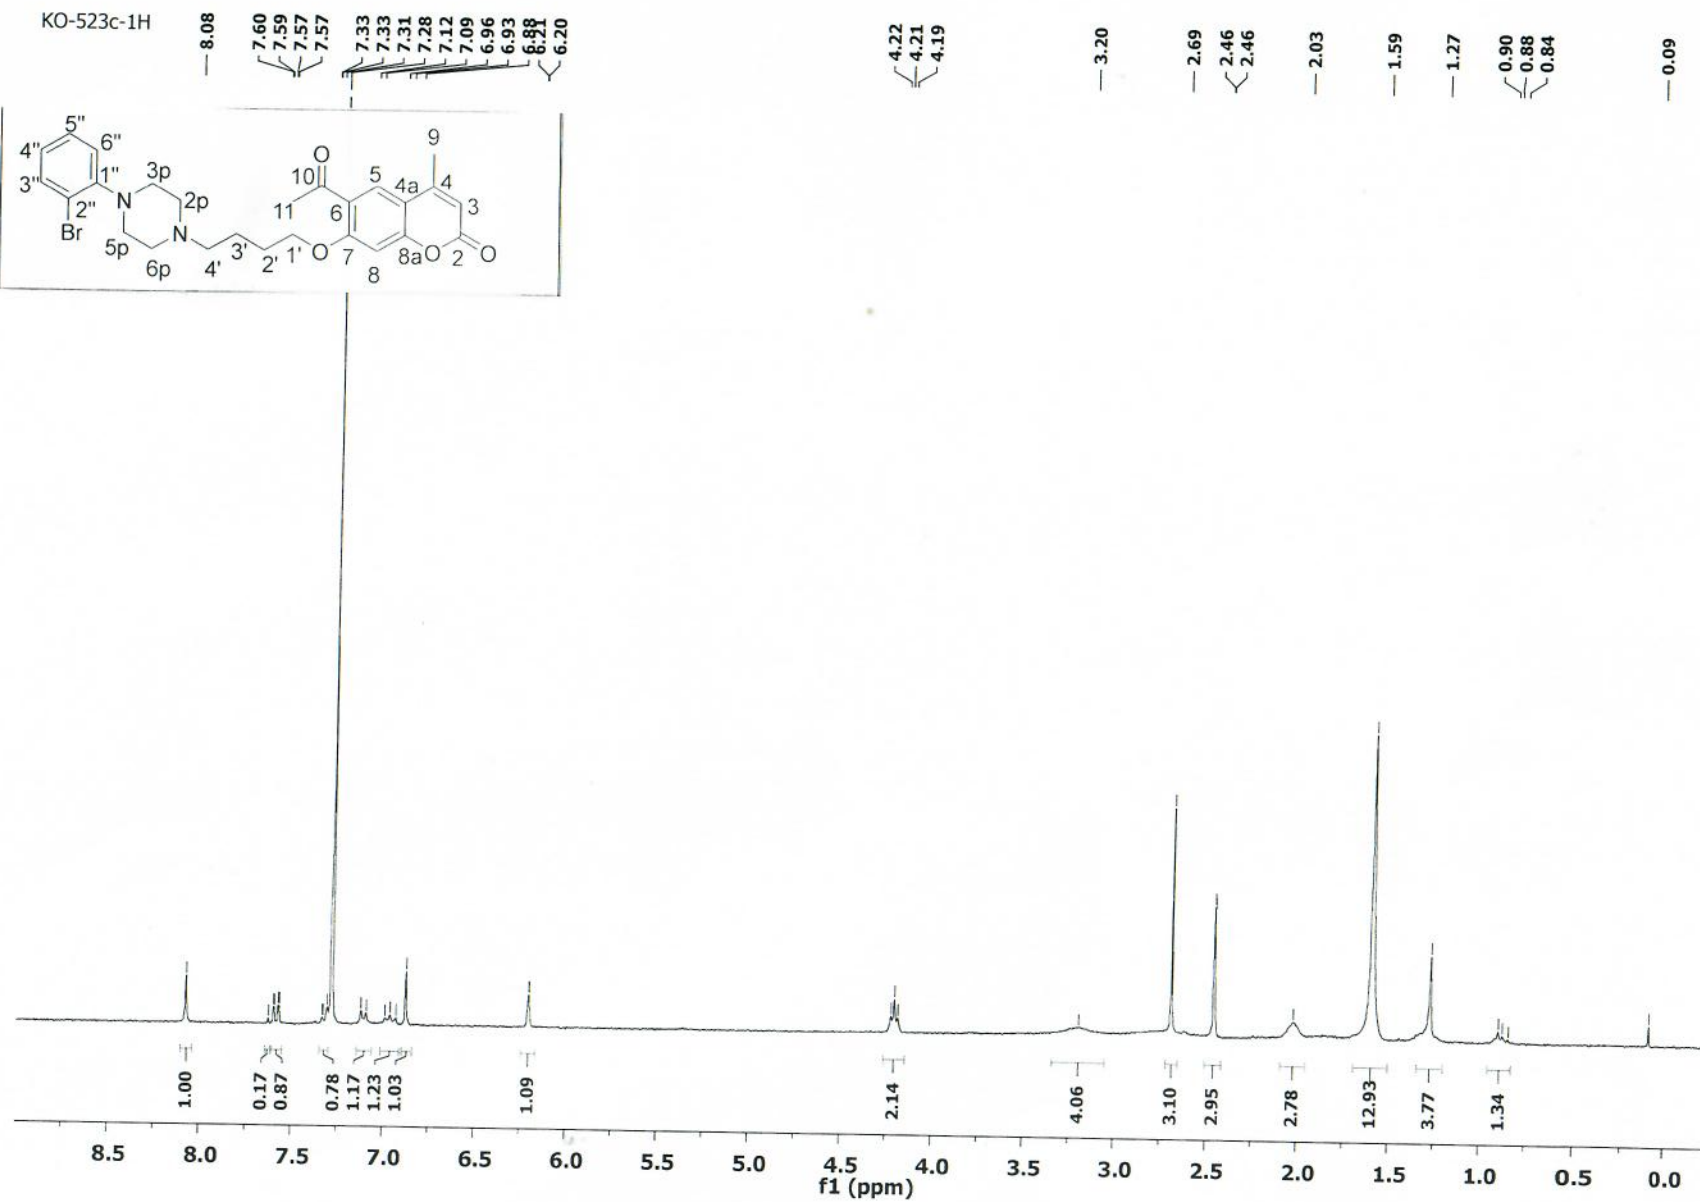



KO-523c-13C

— 197.72

160.83  
160.50  
157.68  
152.89

134.01  
128.81  
128.11  
125.13  
121.60  
120.03  
113.68  
113.15

— 100.64

77.65  
77.23  
76.81  
— 68.81

57.59  
52.97  
52.93

32.23  
29.91  
26.78  
— 18.93

3

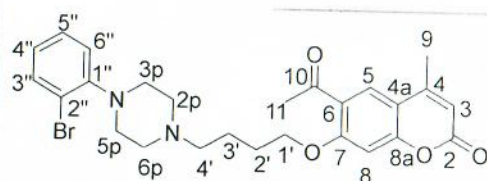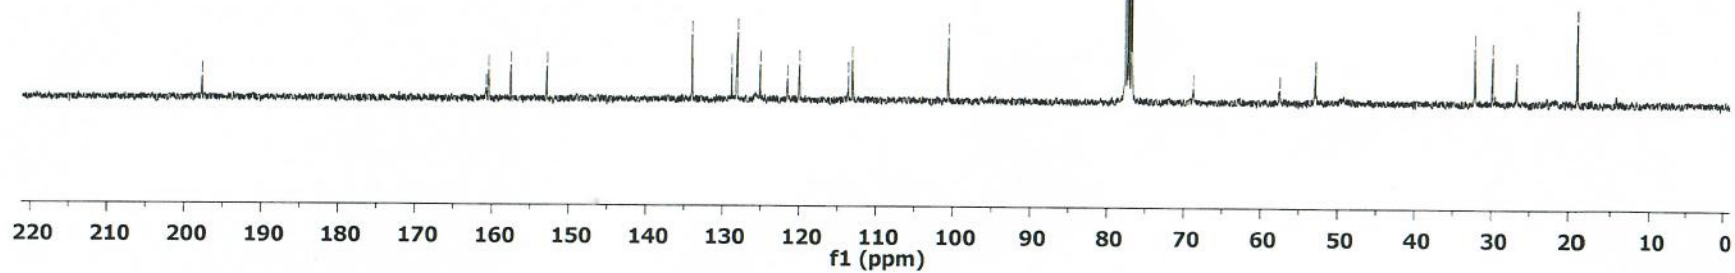

KO-525-1H

8.05

7.28  
7.13  
7.10  
7.07  
7.03  
7.03  
7.02  
6.96  
6.94  
6.85  
6.81  
6.17  
6.17

4.19  
4.17  
4.15

3.24  
3.23  
3.21

2.67  
2.64  
2.55  
2.53  
2.50  
2.43  
2.42

2.01  
1.99  
1.96  
1.94  
1.83  
1.81  
1.78  
1.76

0.08

4

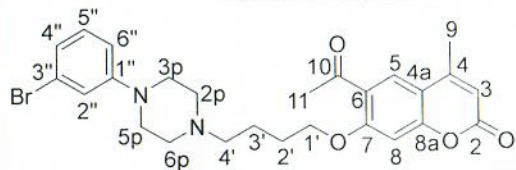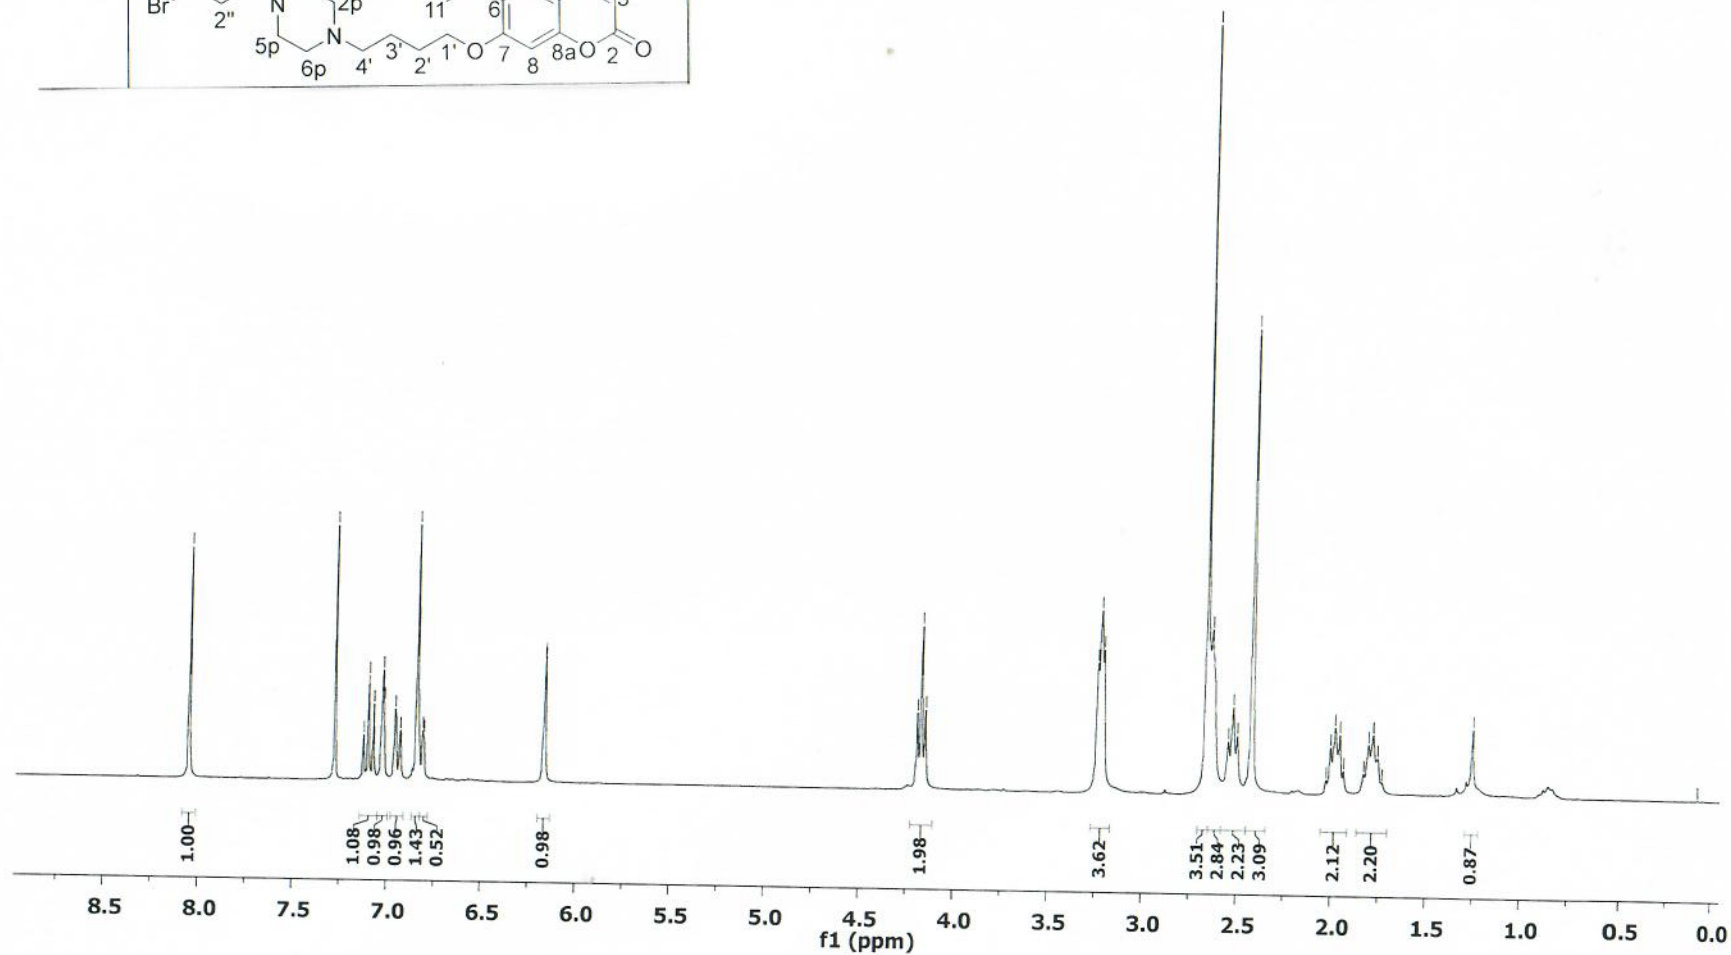

KO-525-13C

— 197.77

161.19  
160.51  
157.69  
152.97  
152.32

130.53  
128.10  
125.00  
123.39  
122.65  
118.98  
114.62  
113.49  
112.93

— 100.53

77.65  
77.23  
76.81  
— 69.30

57.97  
53.00  
48.46

32.30  
27.01  
23.25  
18.89

4

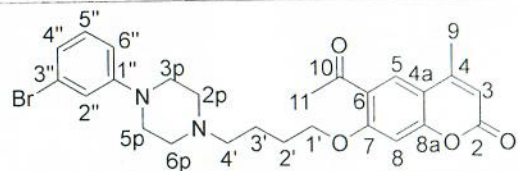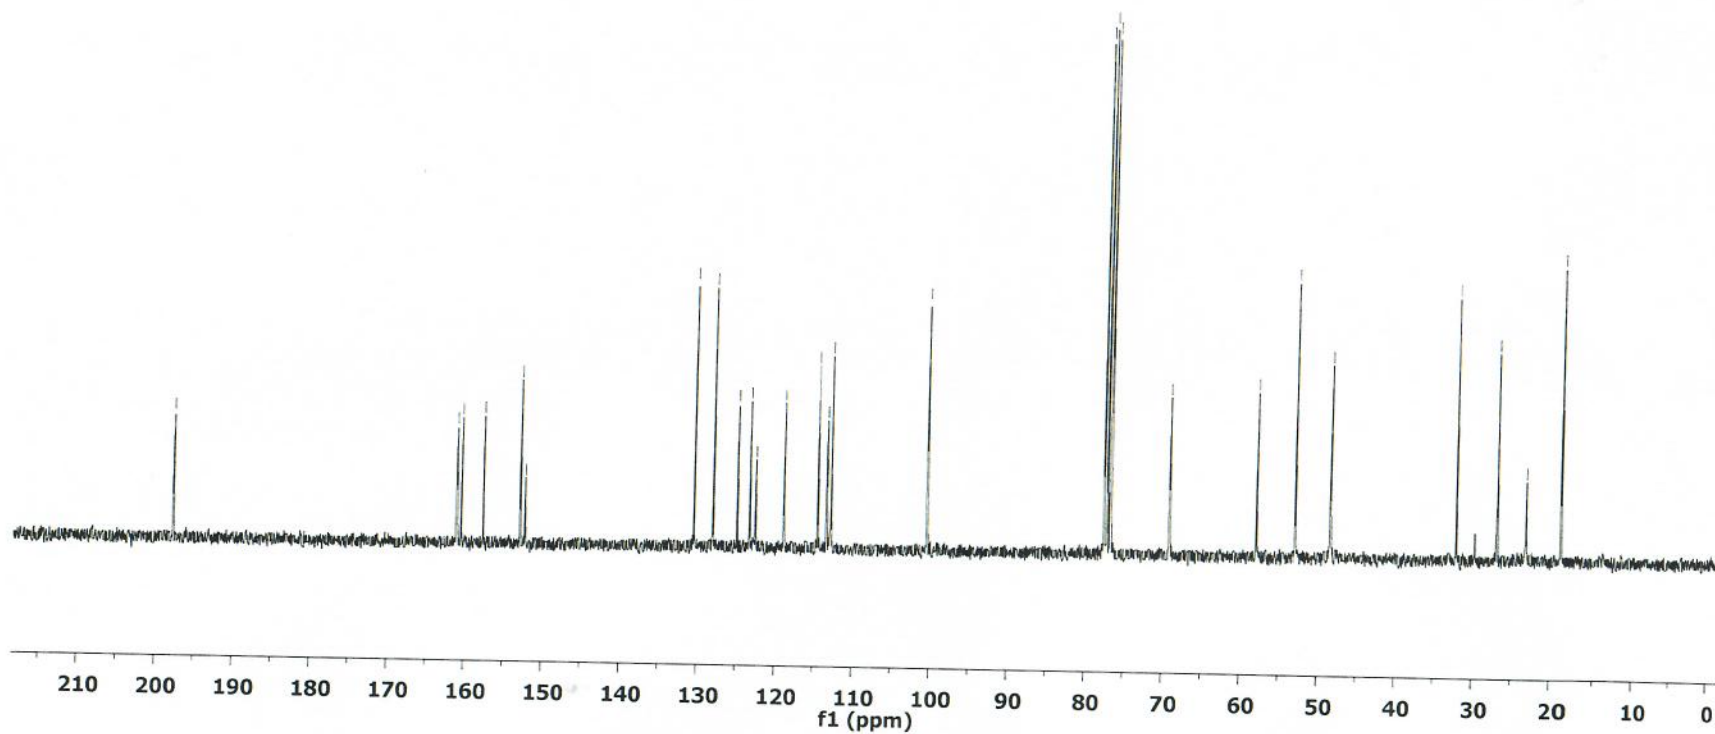

KO-514-IV-doczyszcz

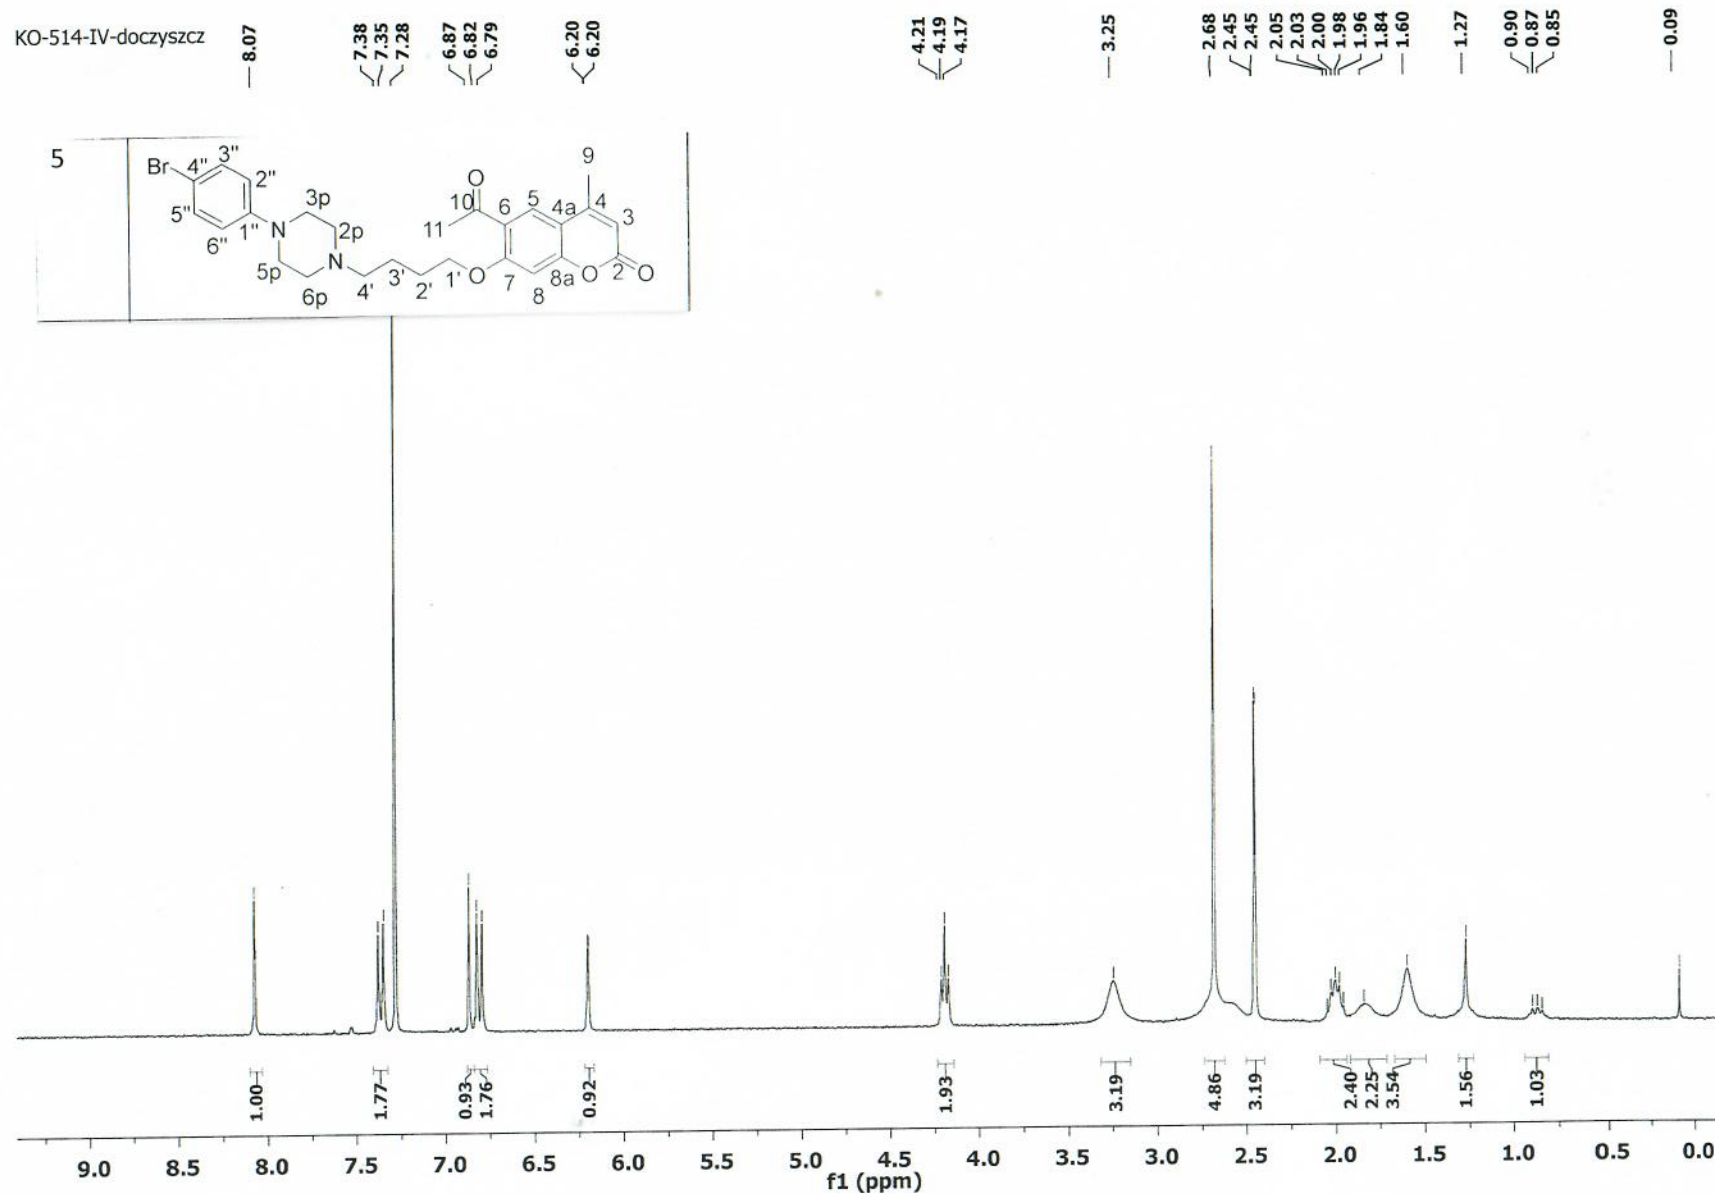

KO-514-IV-13C  
— 197.85

161.17  
160.57  
157.74  
152.99

132.13  
128.15  
125.08

118.03  
113.58  
113.03

100.59

77.65  
77.23  
76.81  
69.29

58.00  
53.03  
48.77  
48.73

32.32

27.03

18.94

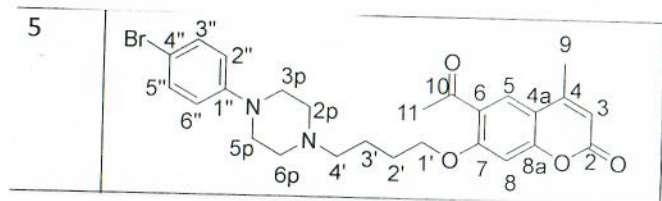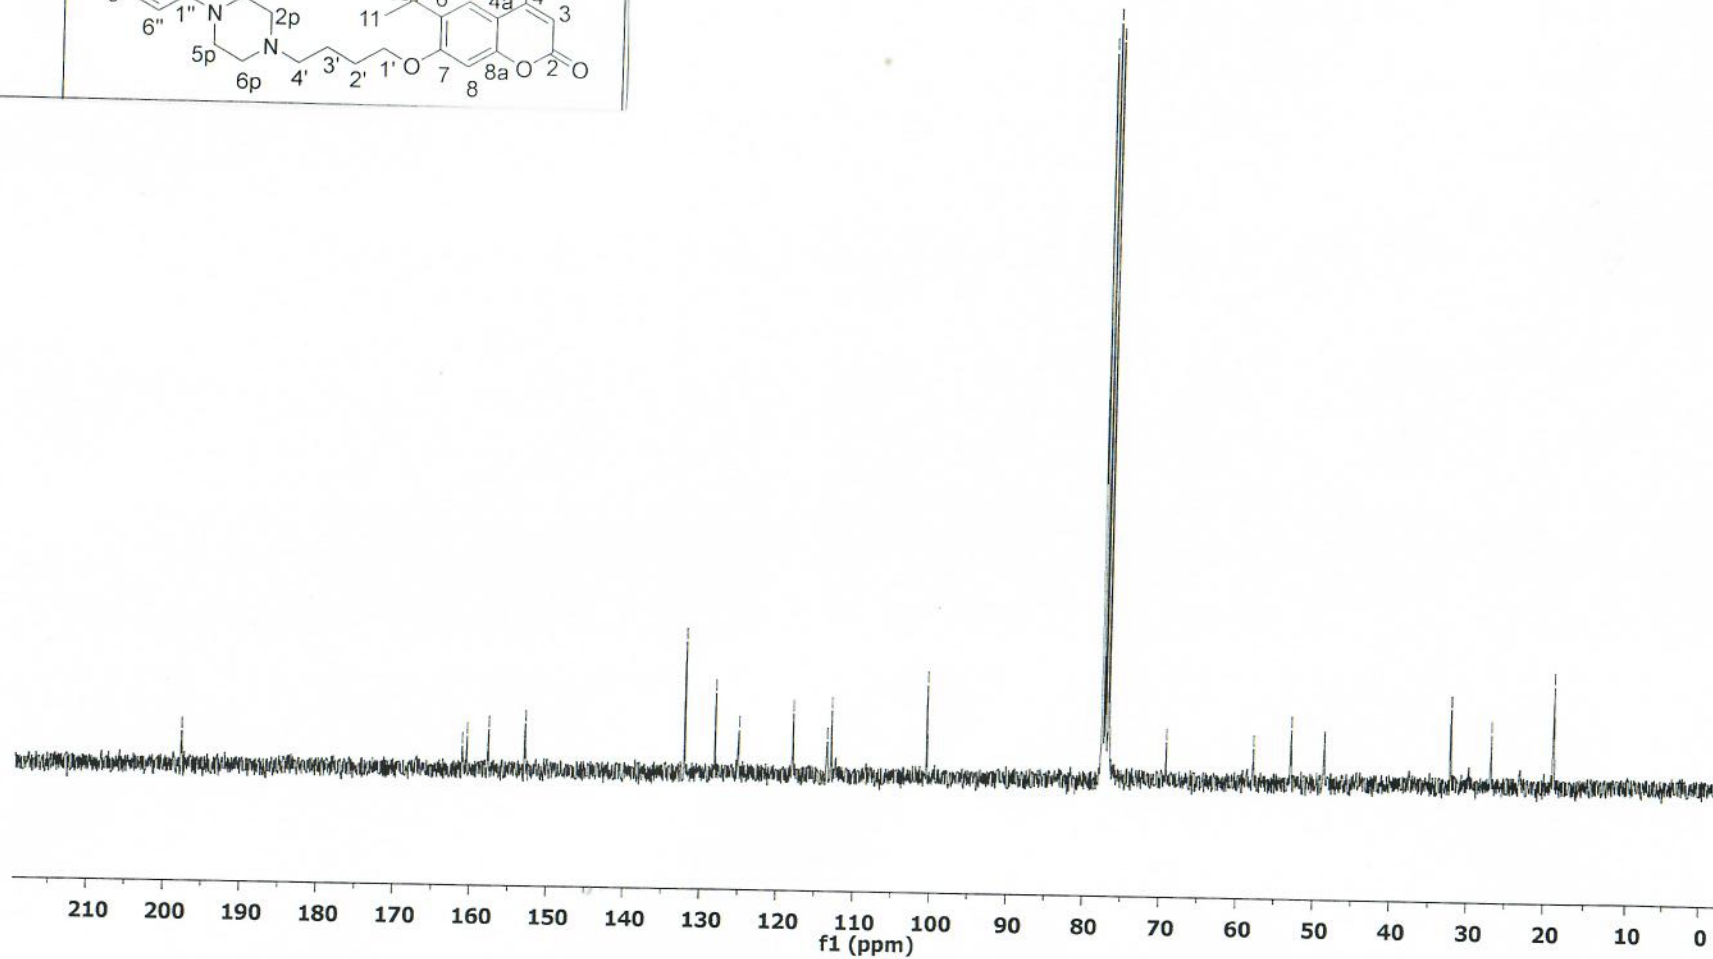

KO-513-III-powt

8.07  
7.28  
7.09  
7.08  
7.07  
7.06  
7.05  
7.01  
7.01  
6.98  
6.96  
6.95  
6.95  
6.36  
6.19

4.22  
4.20  
4.17

3.23

2.81

2.68

2.64

2.45

2.45

2.06

2.03

2.01

1.99

1.97

1.90

1.88

1.27

0.91

0.89

0.87

0.84

0.08

6

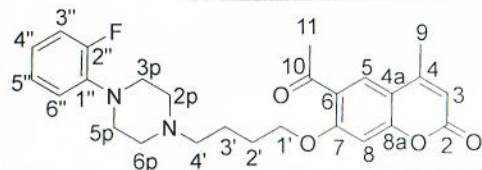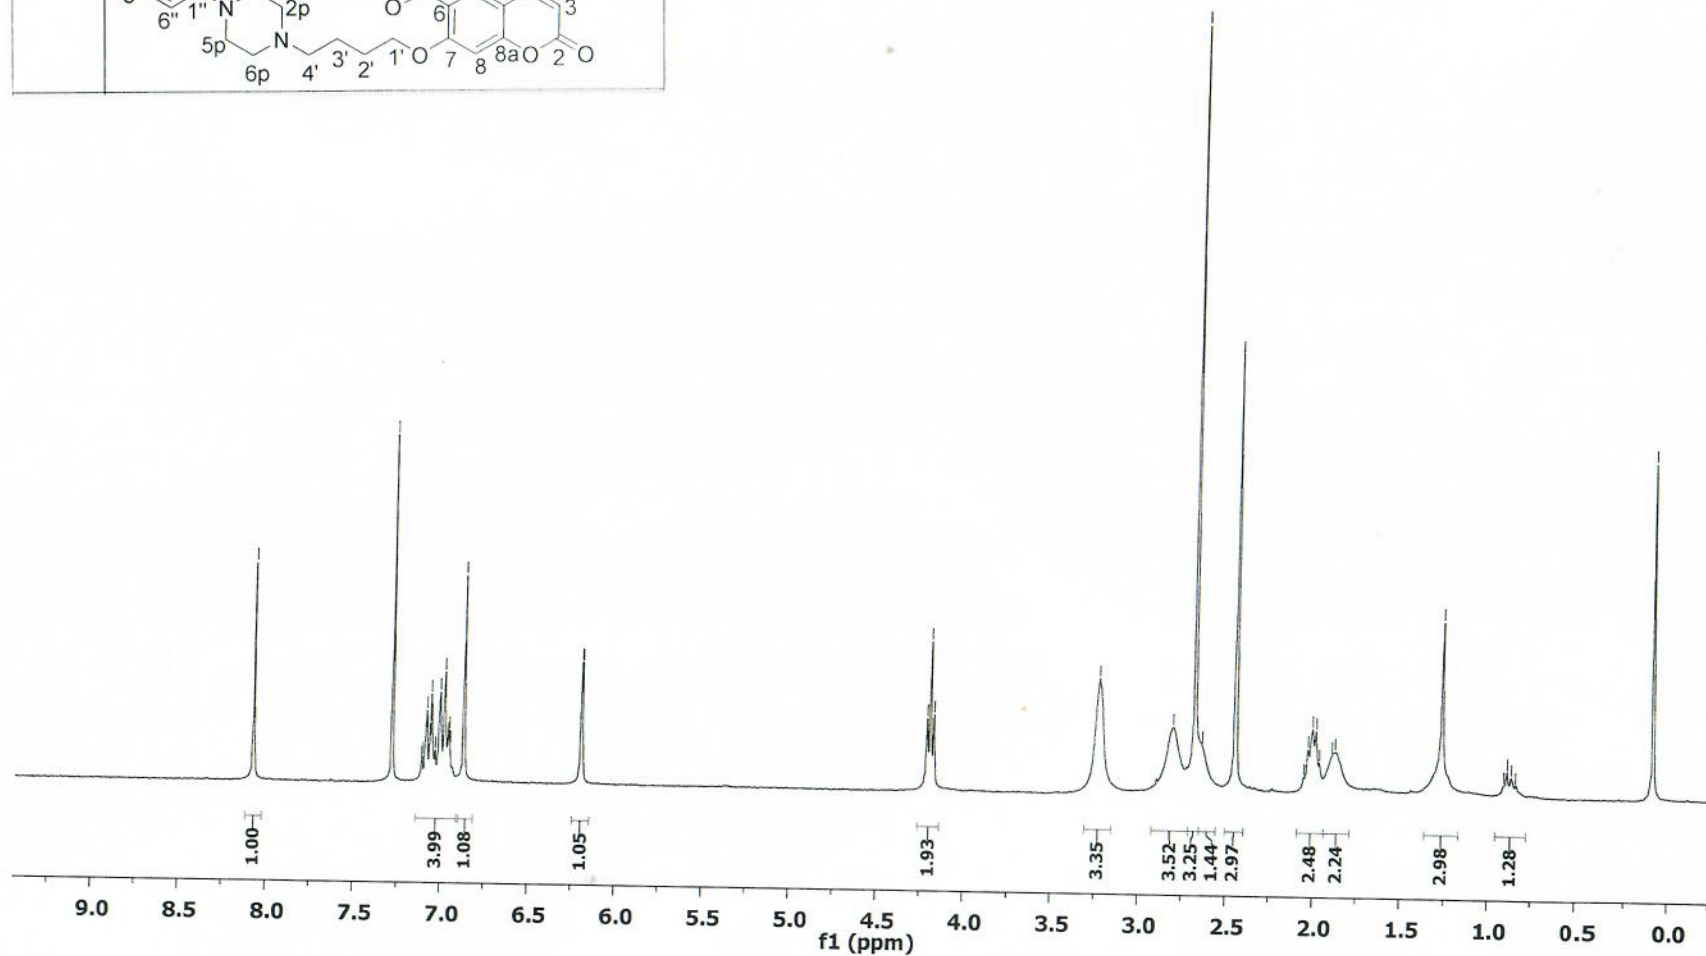

KO-513-III-13C

197.80

161.02  
160.56  
157.71  
157.47  
154.21  
152.95

128.14  
125.10  
124.85  
124.80  
123.45  
119.41  
119.38  
116.53  
116.25  
113.62  
113.08  
100.61

77.65  
77.23  
76.81

69.06

57.83  
53.04  
49.22

32.28  
29.91  
26.90

18.94

1.23

6

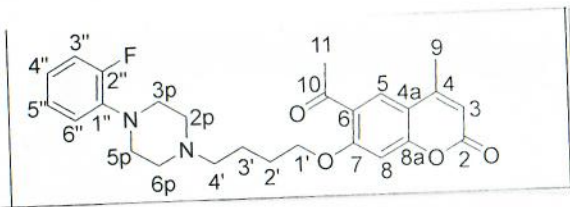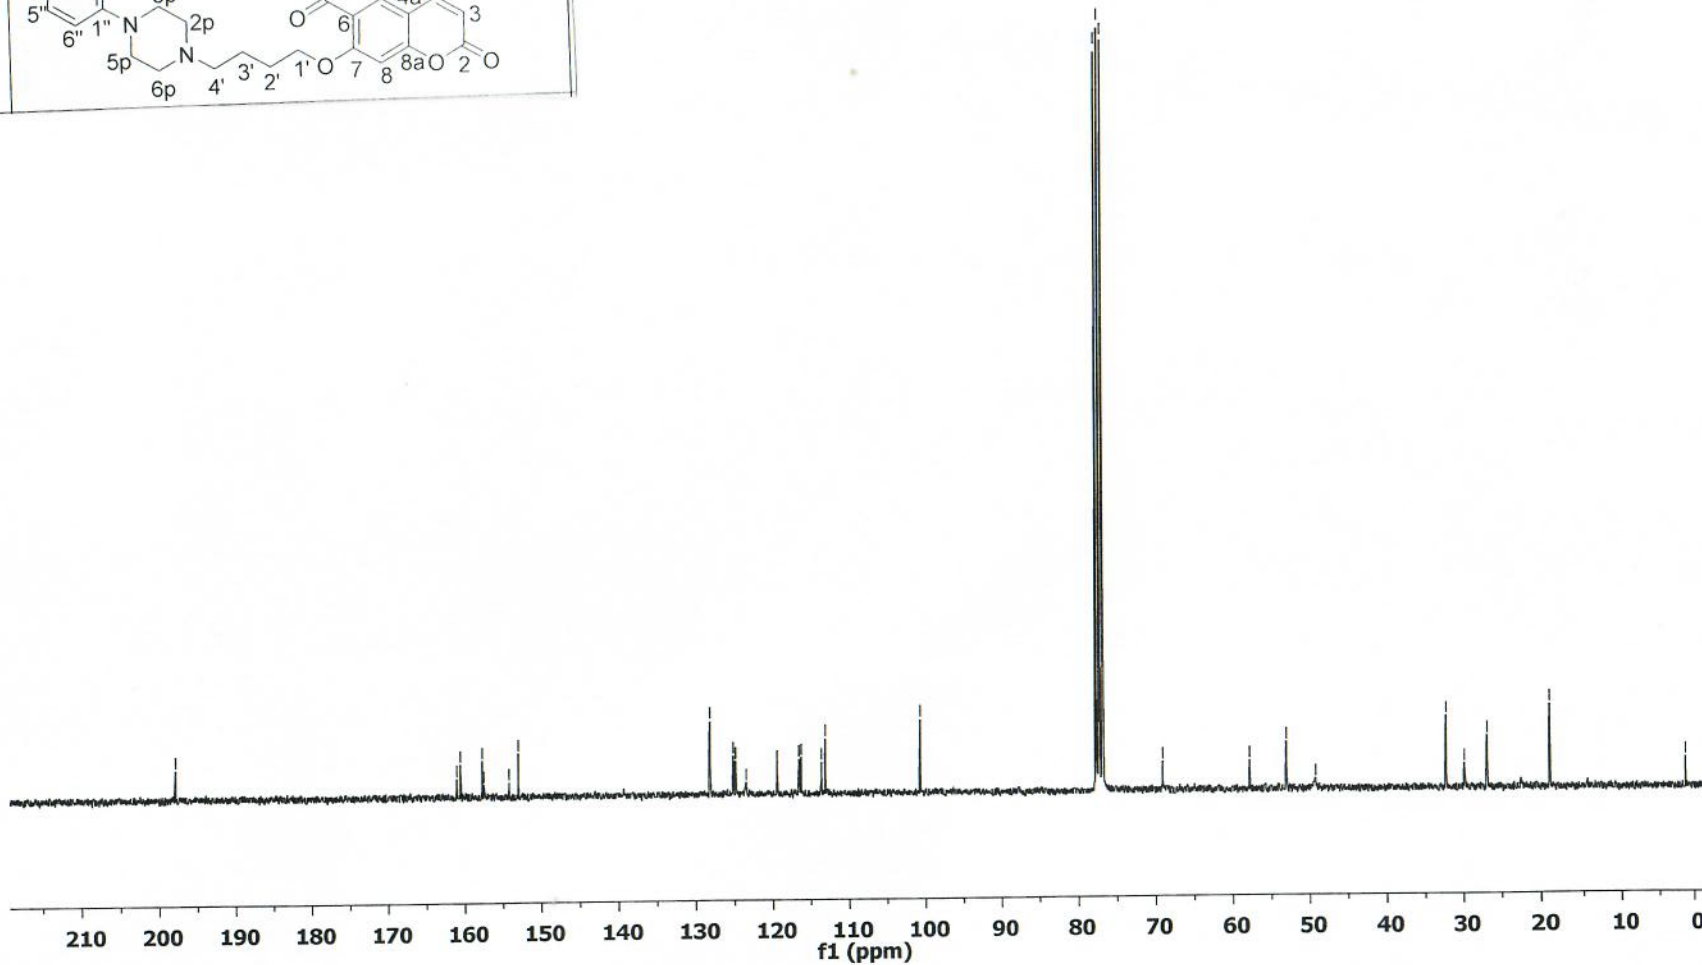



KO-522C

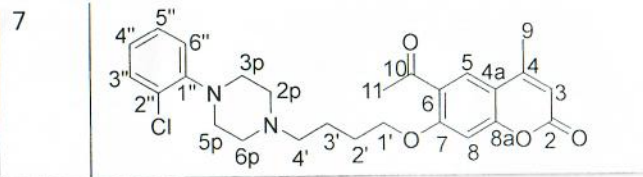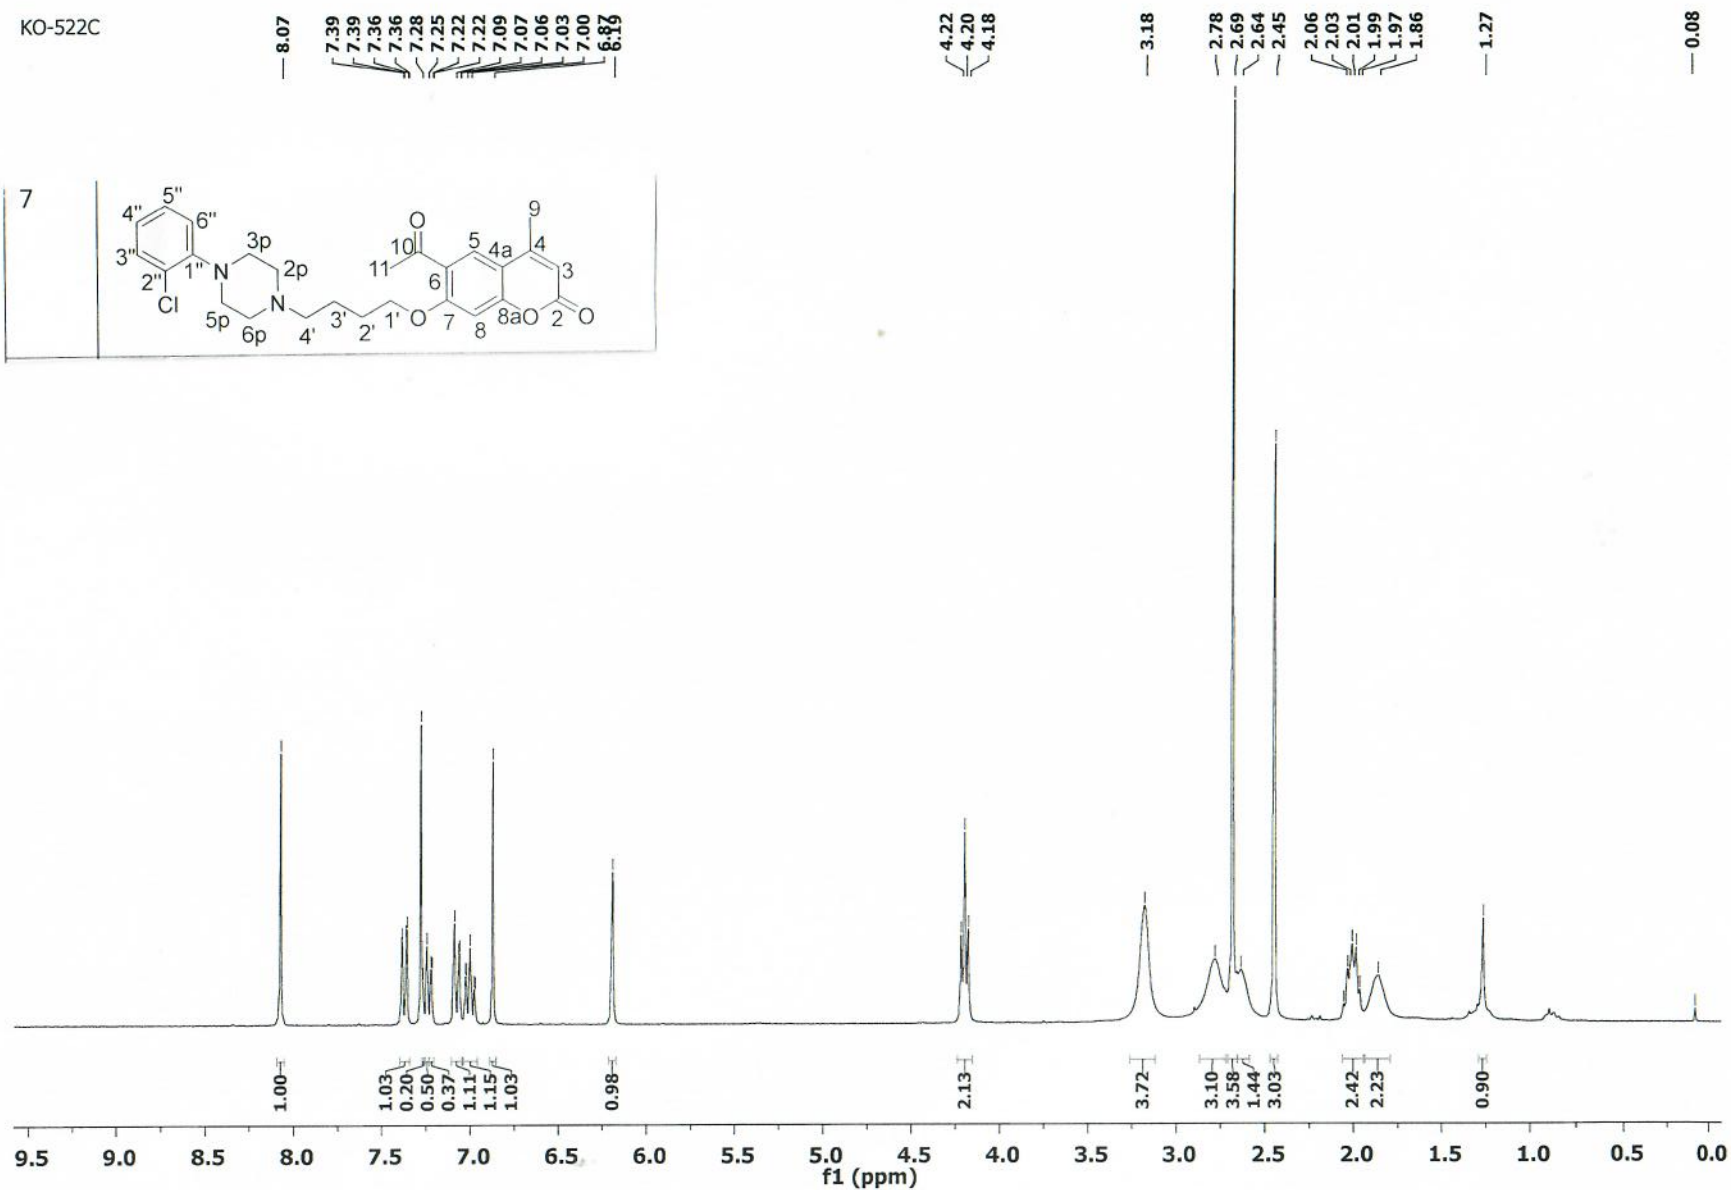



KO-522-C-13C

— 197.83

161.16  
160.57  
157.73  
152.99

130.82  
128.92  
128.15  
127.91  
125.05  
124.33  
120.73  
113.56  
113.00

— 100.58

77.65  
77.23  
76.81  
— 69.24

58.01  
53.35  
50.52

32.33  
27.01  
22.95  
18.93

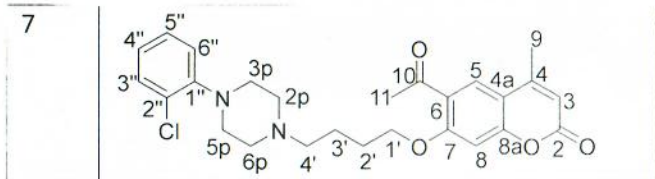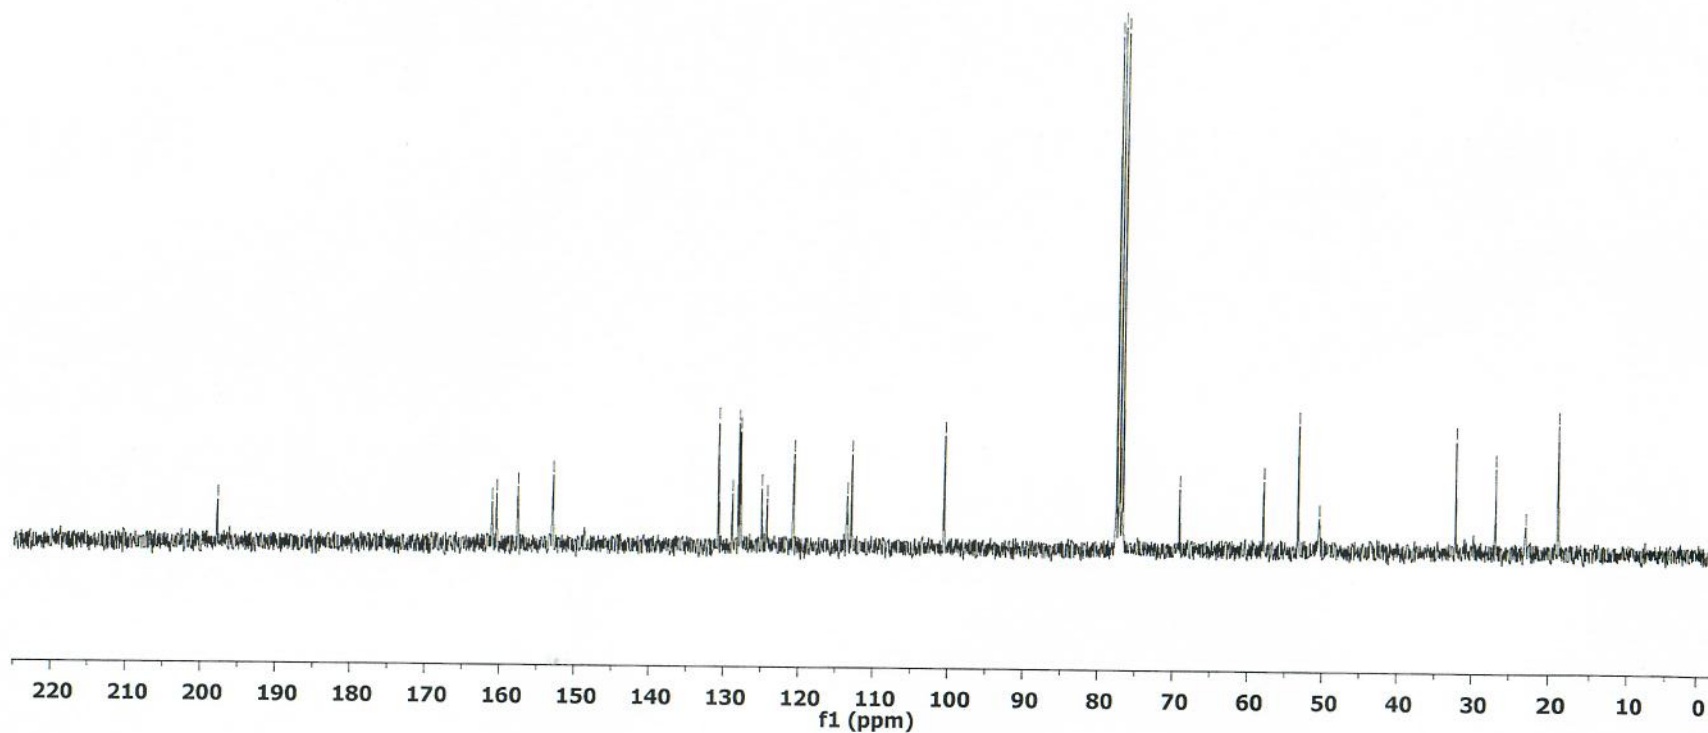

<sup>1</sup>H NMR spectrum of KO-515B-1H in CDCl<sub>3</sub>. The spectrum shows peaks at 8.05, 7.62, 7.59, 7.57, 7.54, 7.52, 7.27, 7.10, 7.08, 6.85, 6.20, and 6.20 ppm.

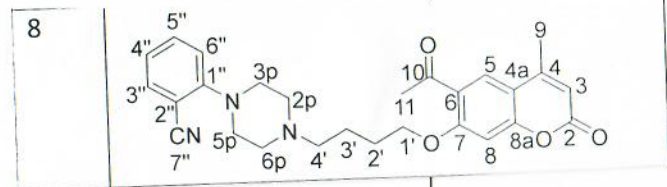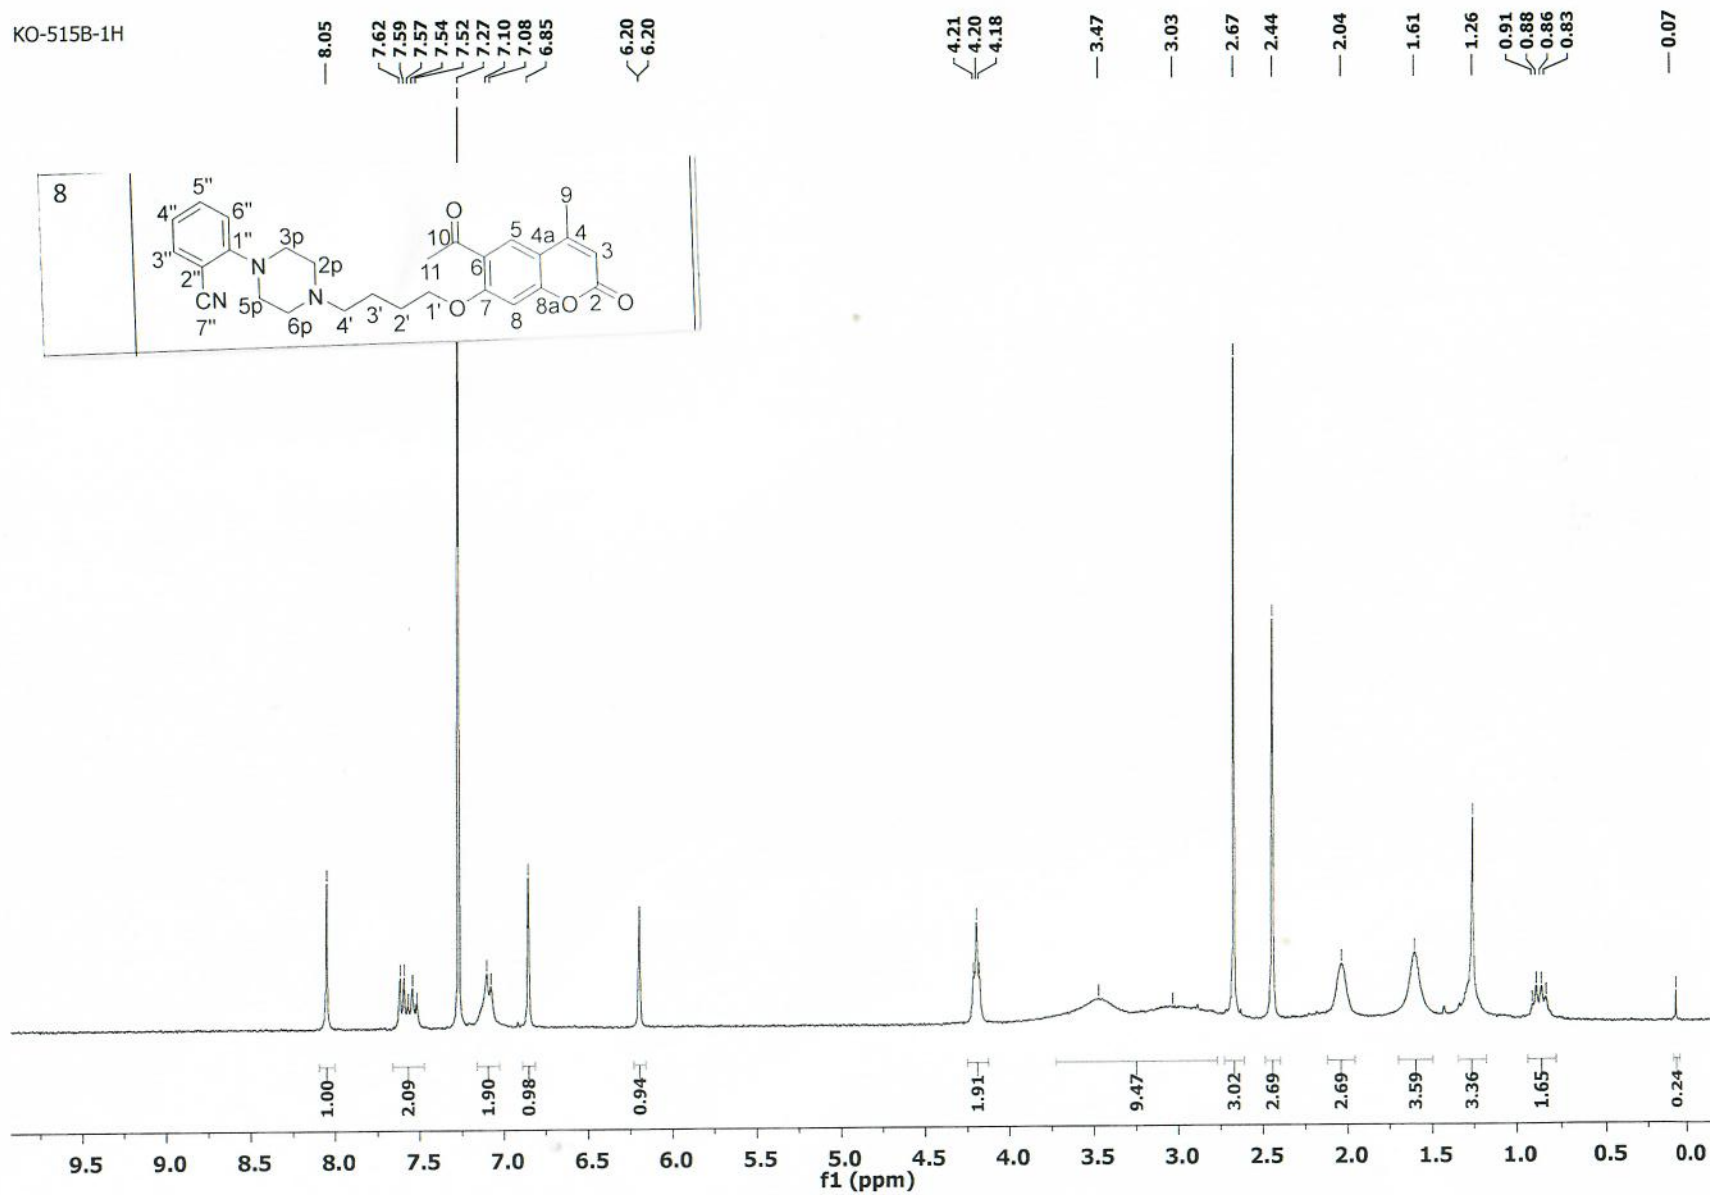

69.

—197

160.53  
 157.67  
 152.89

— 134.36

— 128.14

— 125.11

$$\begin{array}{r} 113.69 \\ 113.16 \\ \hline \end{array}$$

— 100.65

77.65  
77.23  
76.81

— 68.75

— 57.55

— 52.79

— 32.22  
— 29.91  
— 26.73

— 18.94

— 1.24

8

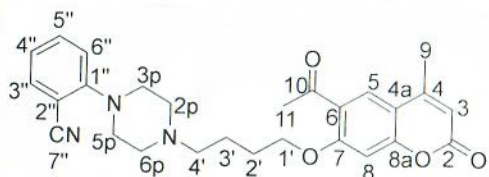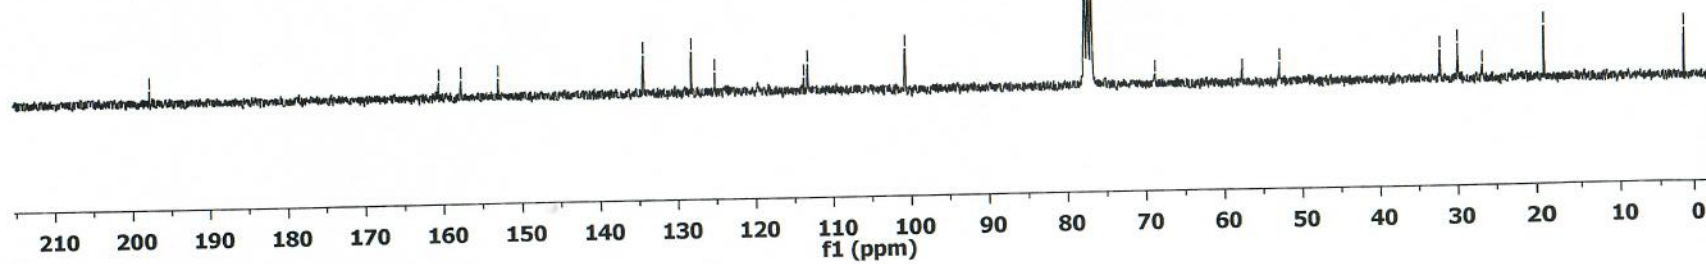

KO-512b-1H

8.07

7.28  
7.20  
7.18  
7.17  
7.16  
7.13  
7.02  
7.00  
6.99  
6.98  
6.97  
6.95  
6.87  
6.19  
6.19

4.22  
4.20  
4.17

3.13  
2.72  
2.68  
2.60  
2.58  
2.56  
2.45  
2.45  
2.03  
2.00  
1.98  
1.96  
1.86  
1.83  
1.81  
1.79  
1.77

0.08

9

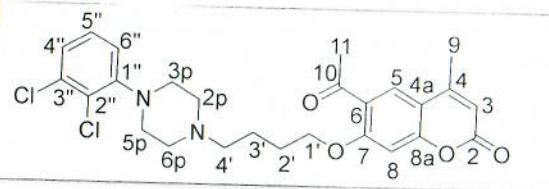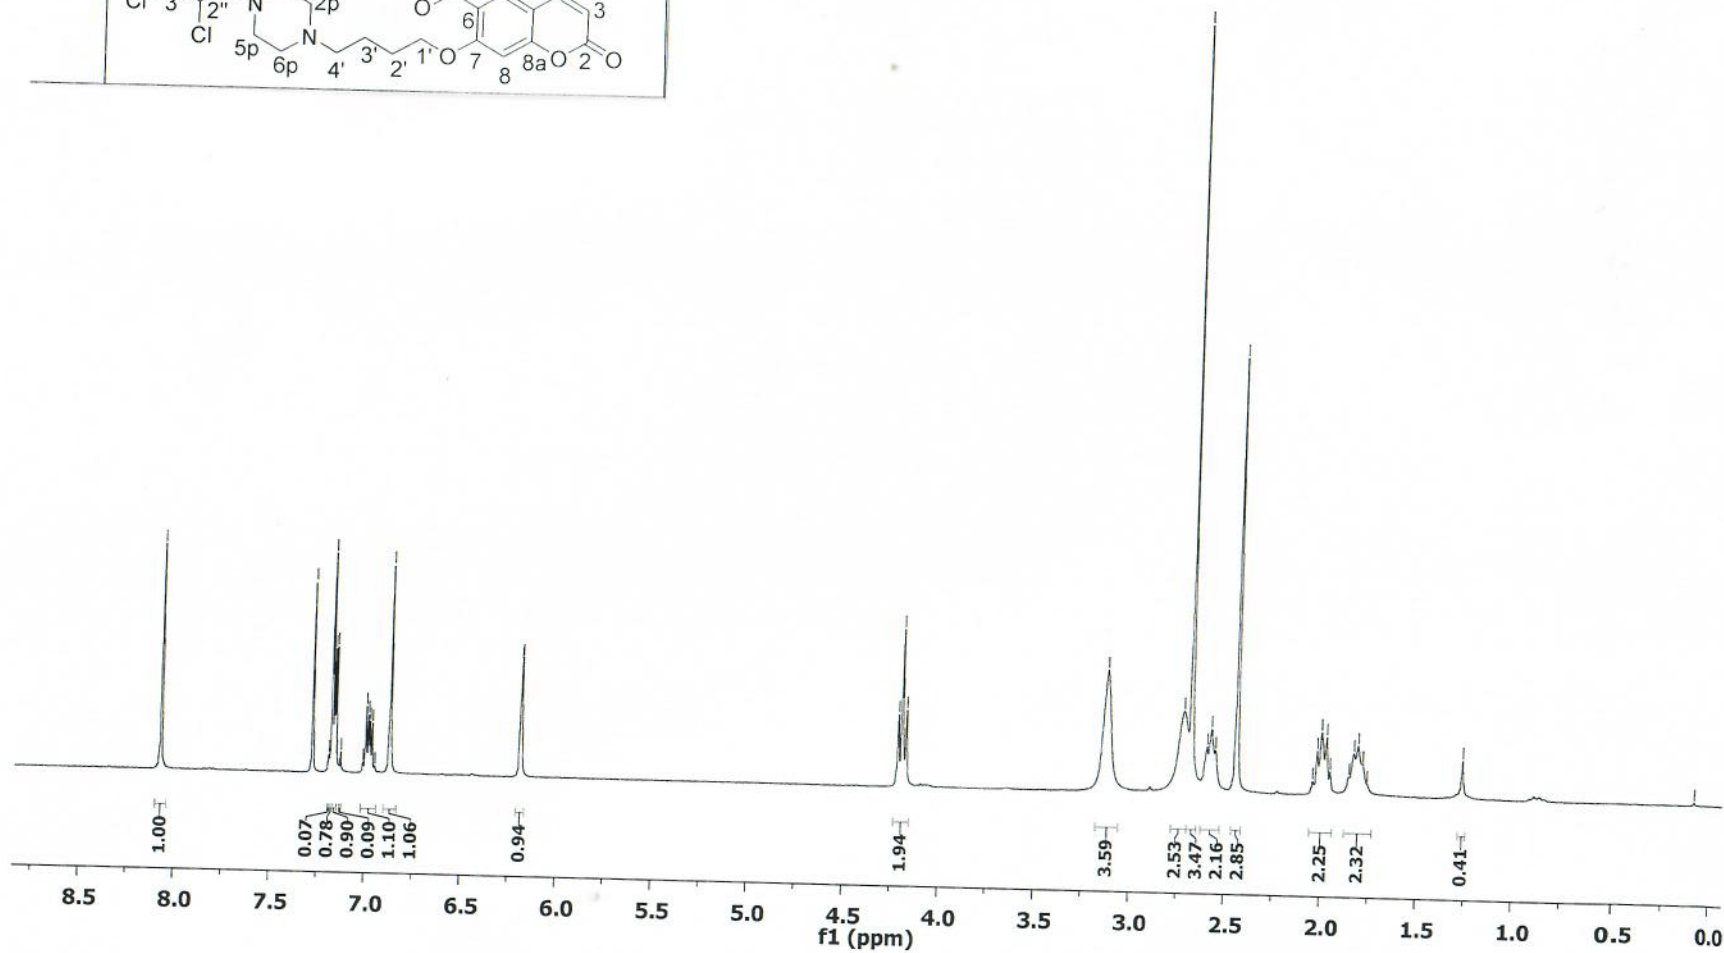

KO-512b-13C88

— 197.

161.15  
160.55  
157.71  
152.98

— 134.23

|                   |
|-------------------|
| 128.13            |
| 127.77            |
| 125.20            |
| <del>125.95</del> |

113.55  
112.99

— 100.57

77.65  
77.23  
76.81

— 69.24

57.95  
 53.28  
 50.67

— 32.31

26.98  
23.02  
18.92

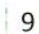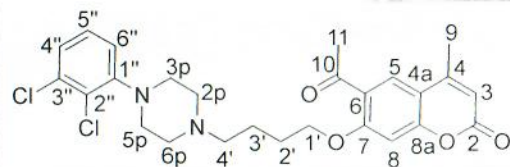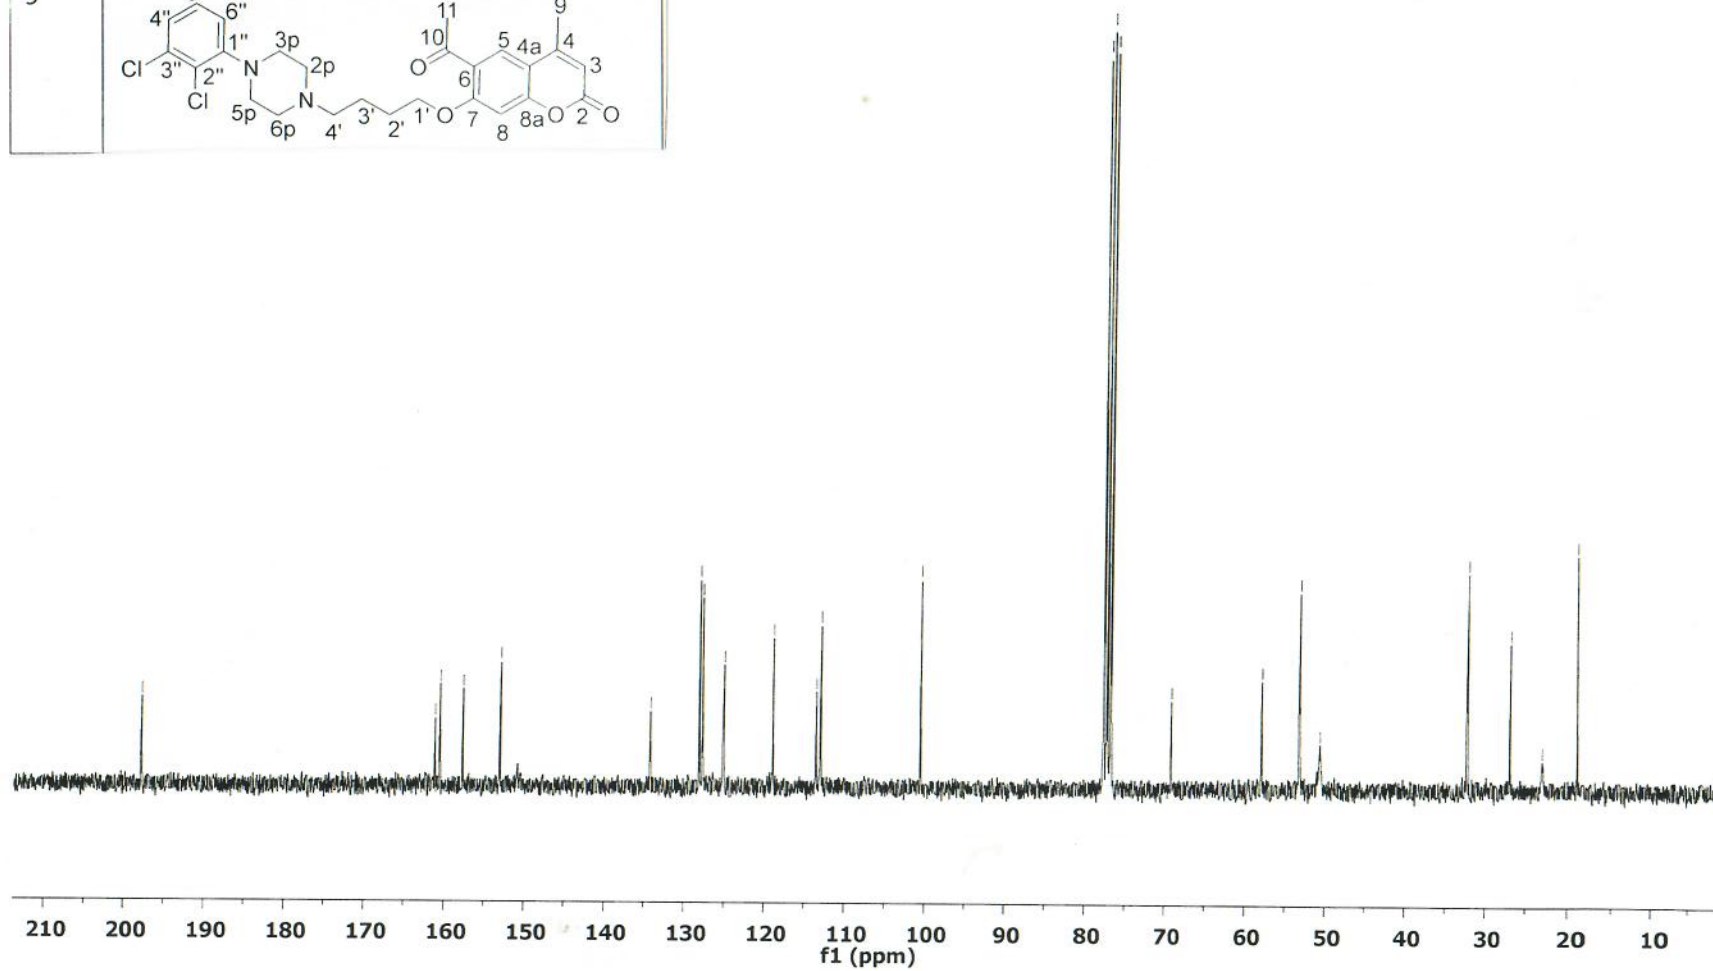

KO-524-1H

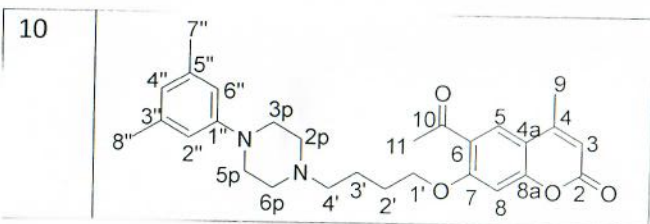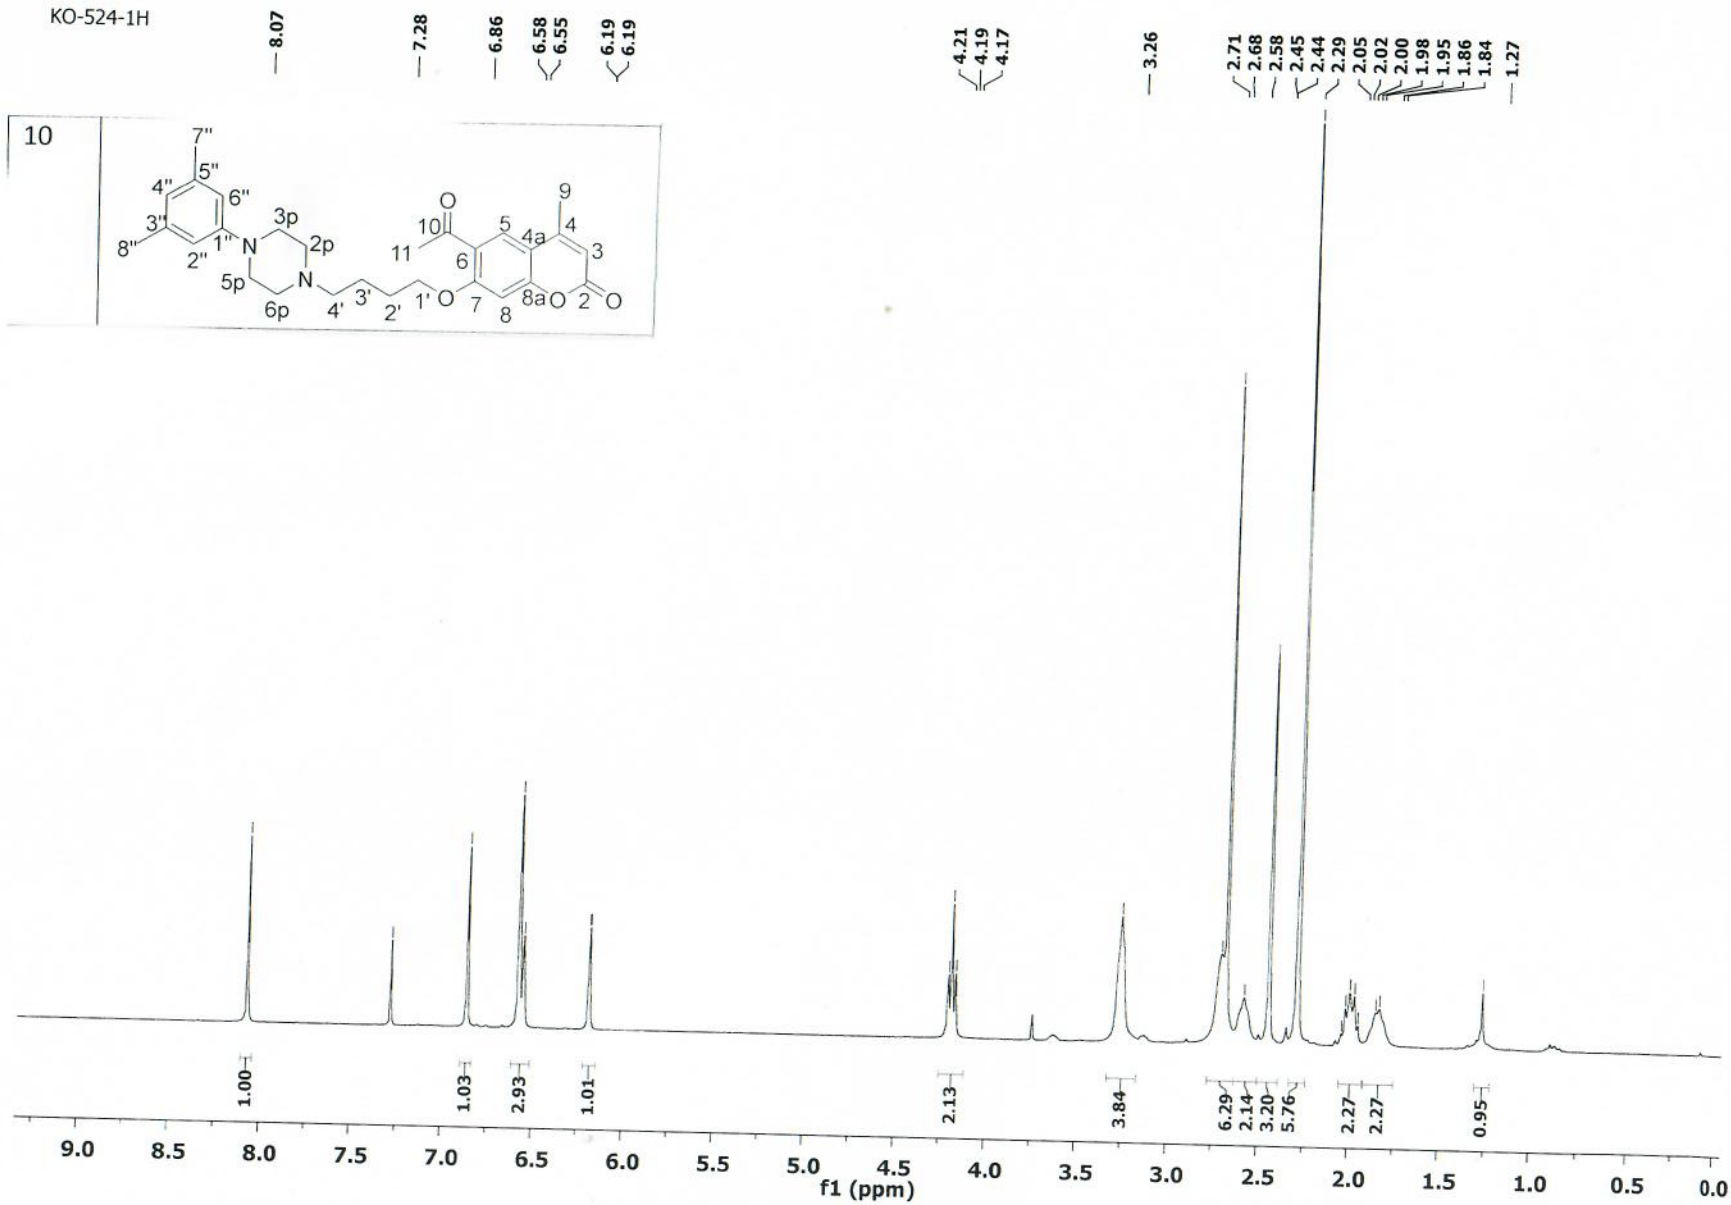

KO-524-13C

— 197.72

161.23  
160.47  
157.67  
152.94  
151.35

— 138.75

128.07  
124.92  
121.94

114.24  
113.42  
112.85

— 100.48

77.65  
77.23  
76.81  
— 69.36

58.10  
53.36  
49.21

32.29  
29.82  
27.05  
23.40  
21.78  
18.83

10

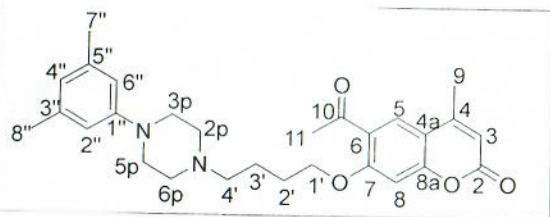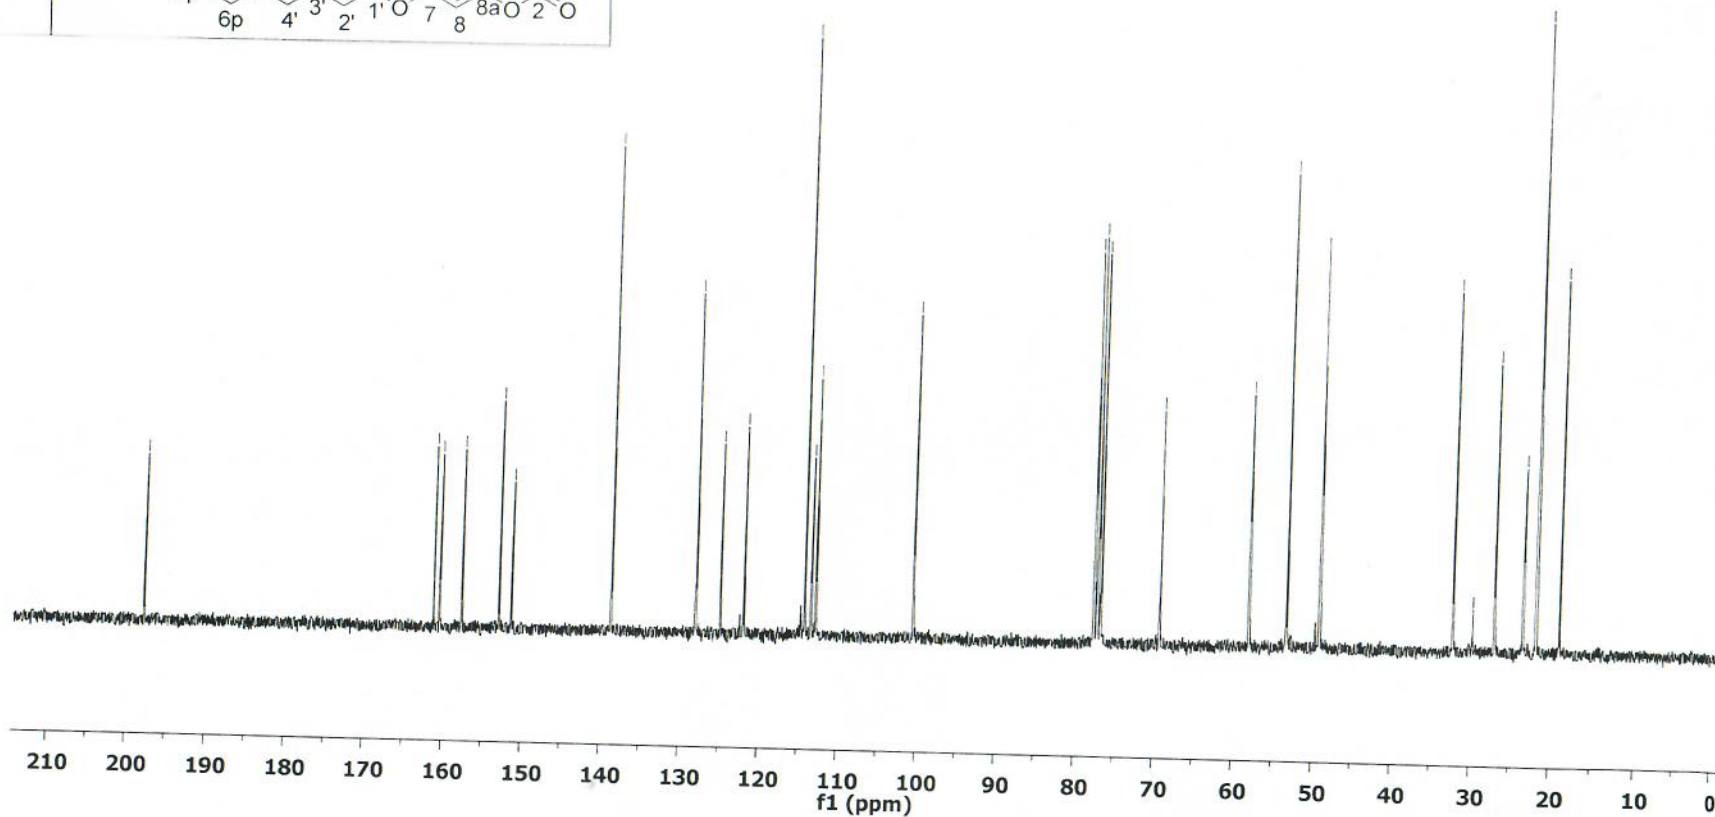



KO-519-I

11

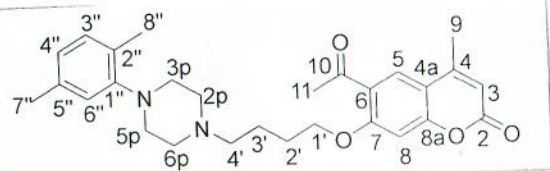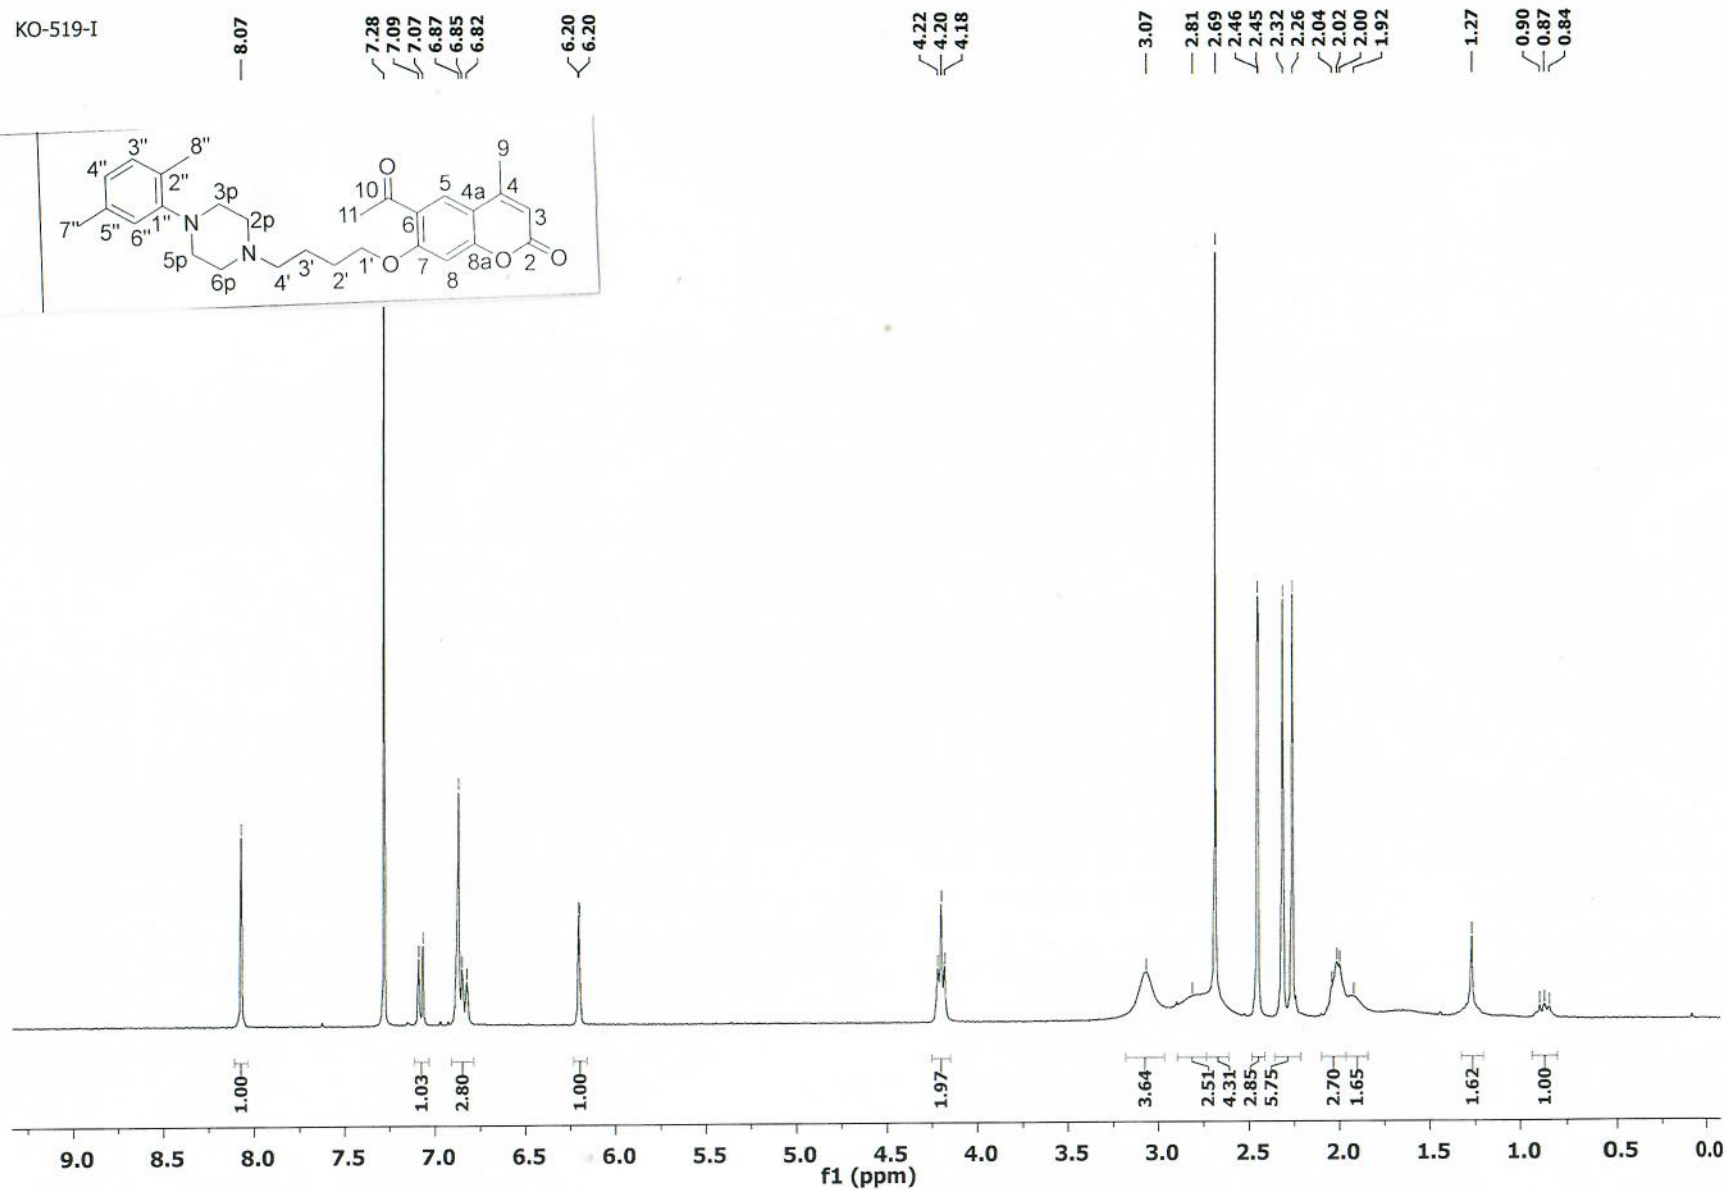



KO-519-I-13C

— 197.80

160.99  
160.54  
157.70  
152.94

136.65  
131.10  
129.35  
128.11  
125.09  
124.80  
120.38  
113.61  
113.07

— 100.61

77.65  
77.23  
76.81

— 69.04

57.80  
53.47  
50.35

32.28  
29.90  
26.90  
22.39  
21.33  
18.93  
17.54

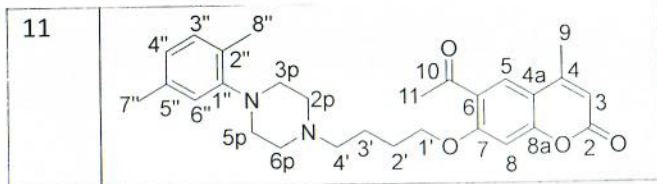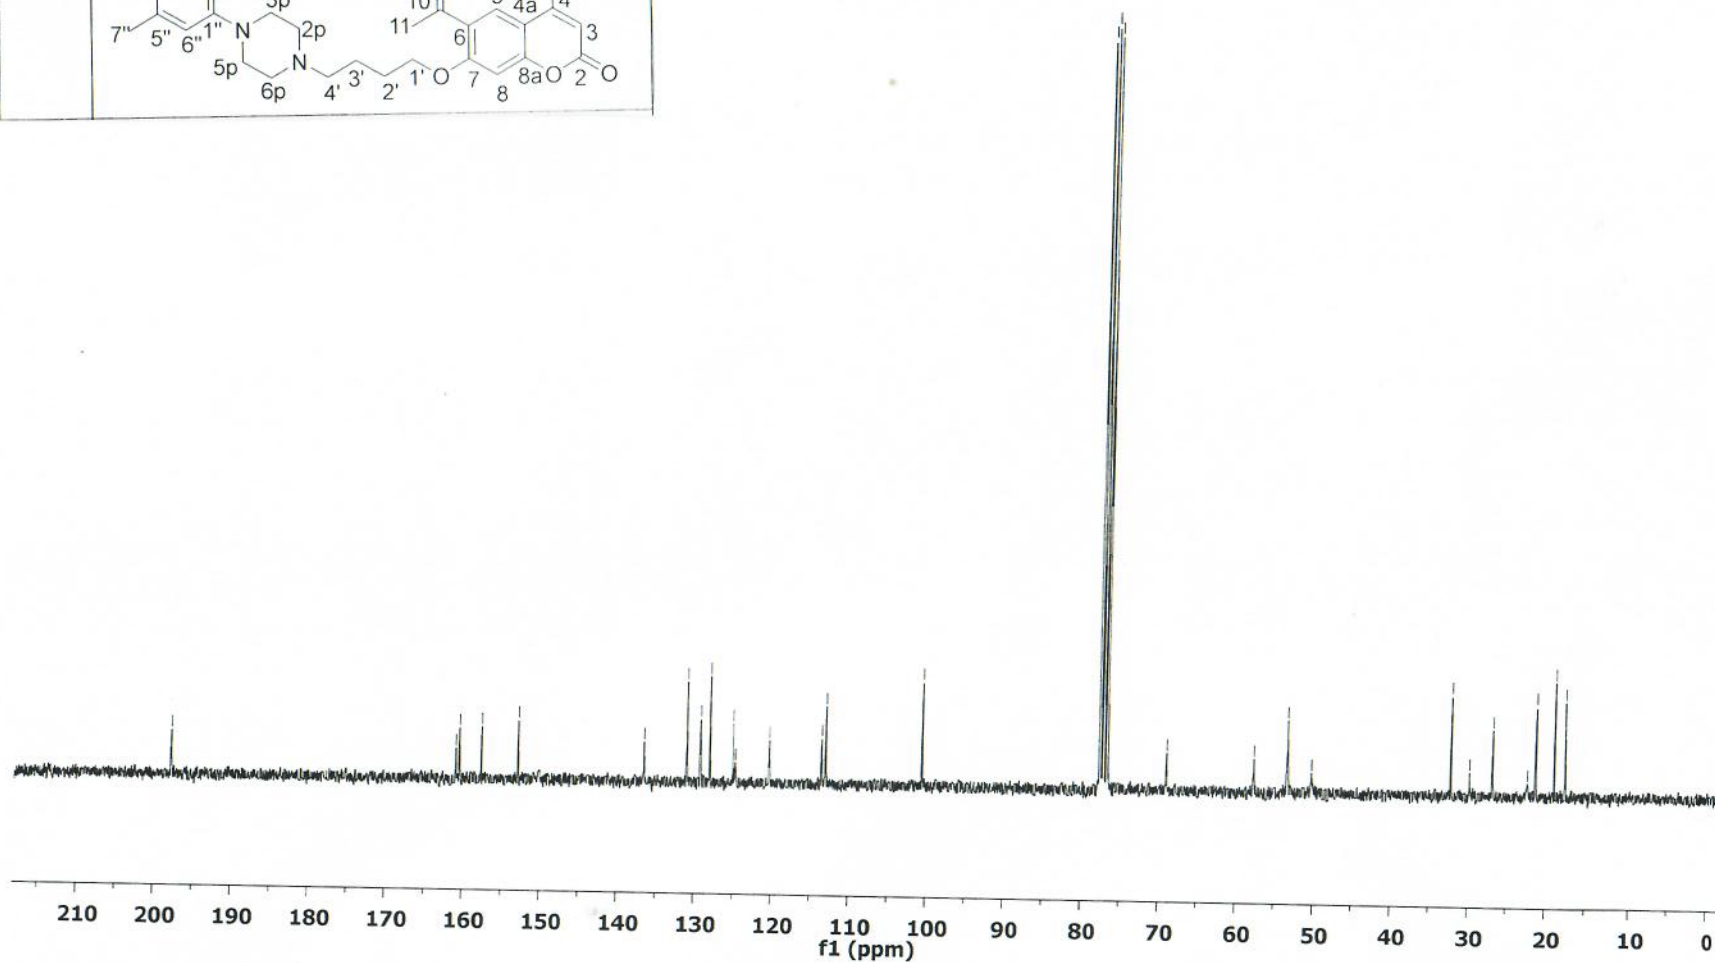

KO-516-II

8.17  
8.14  
8.07

7.28

6.87  
6.84

6.20

4.22  
4.20  
4.18

3.47

2.68  
2.62  
2.45

2.04  
2.01  
1.99  
1.79  
1.60

1.27

12

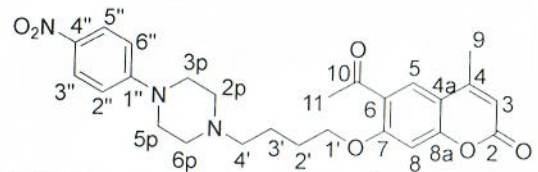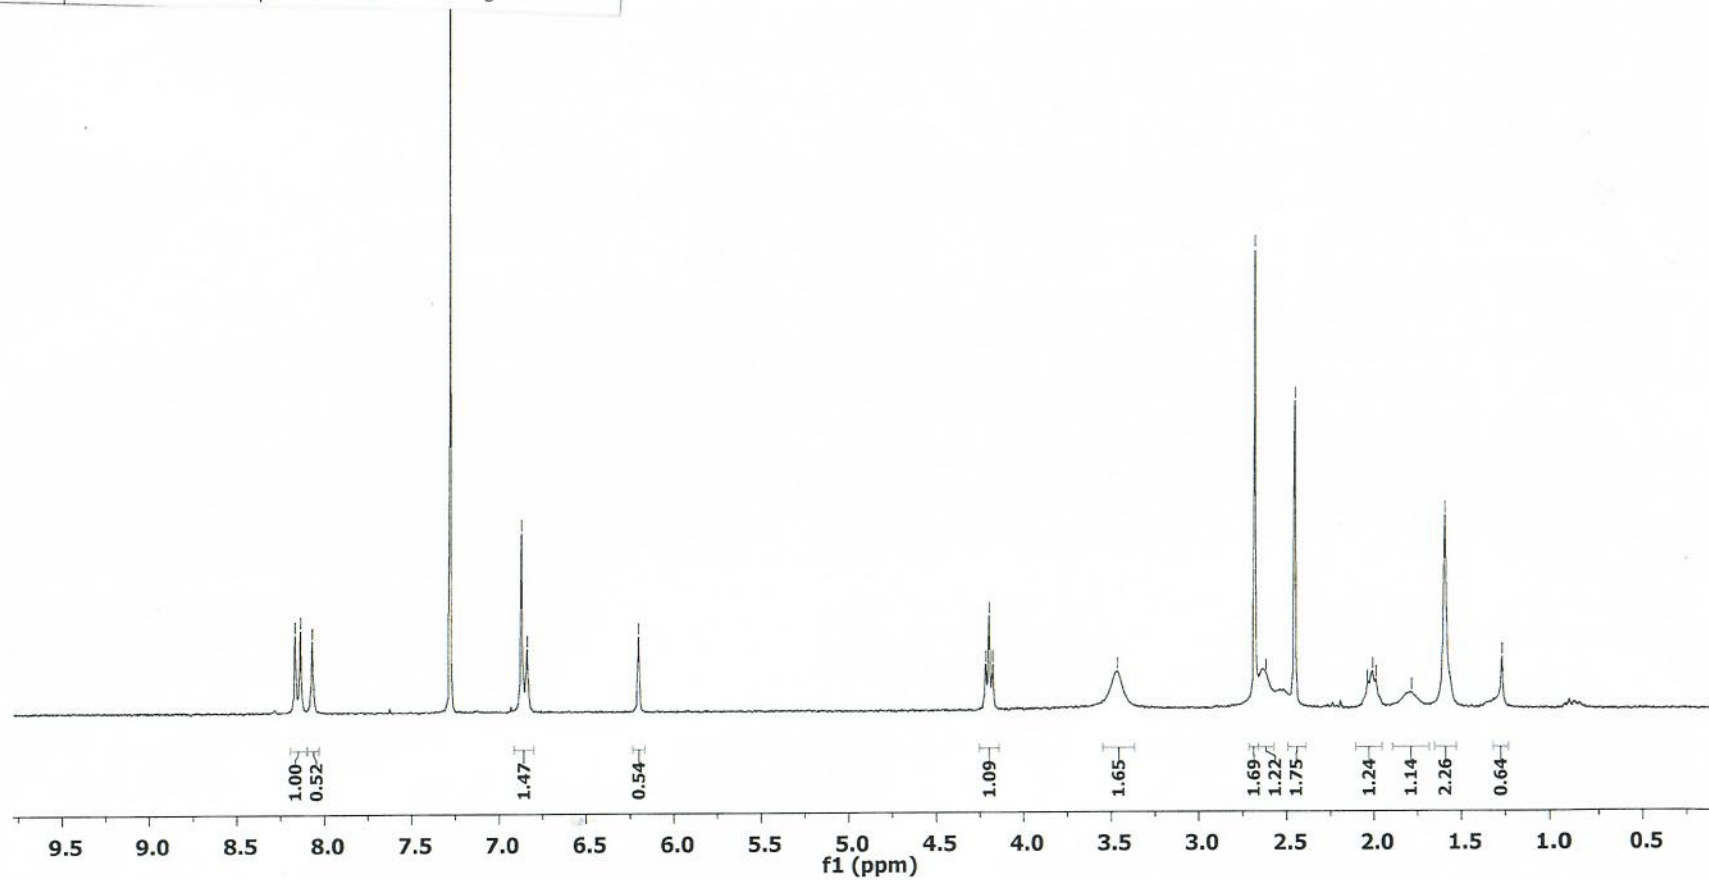

KO-516-II-13C

— 197.85

— 160.55  
— 157.72  
— 152.97  
— 152.93

— 128.13  
— 126.16  
— 125.11

— 113.61  
— 113.07

— 100.59

— 77.65  
— 77.23  
— 76.81  
— 69.20

— 57.85  
— 52.65  
— 46.88

— 32.35  
— 32.25  
— 26.91  
— 18.94

12

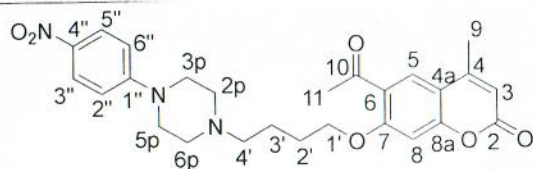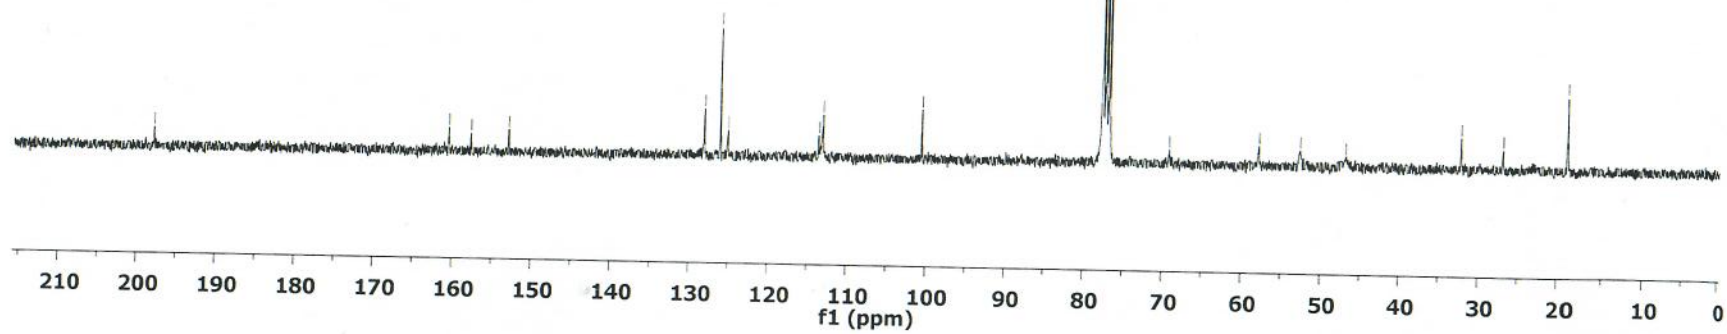

KO-520-III-1H

— 8.07

— 7.28

— 6.86

— 6.19  
— 6.19

— 4.20  
— 4.17  
— 4.15  
— 3.79

— 2.67  
— 2.54  
— 2.45  
— 2.45  
— 2.03  
— 2.01  
— 1.98  
— 1.96  
— 1.94  
— 1.79

— 1.26

— 0.08

13

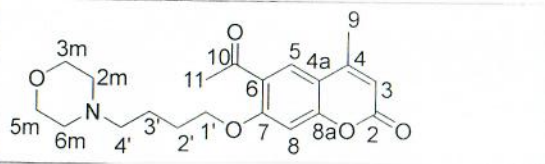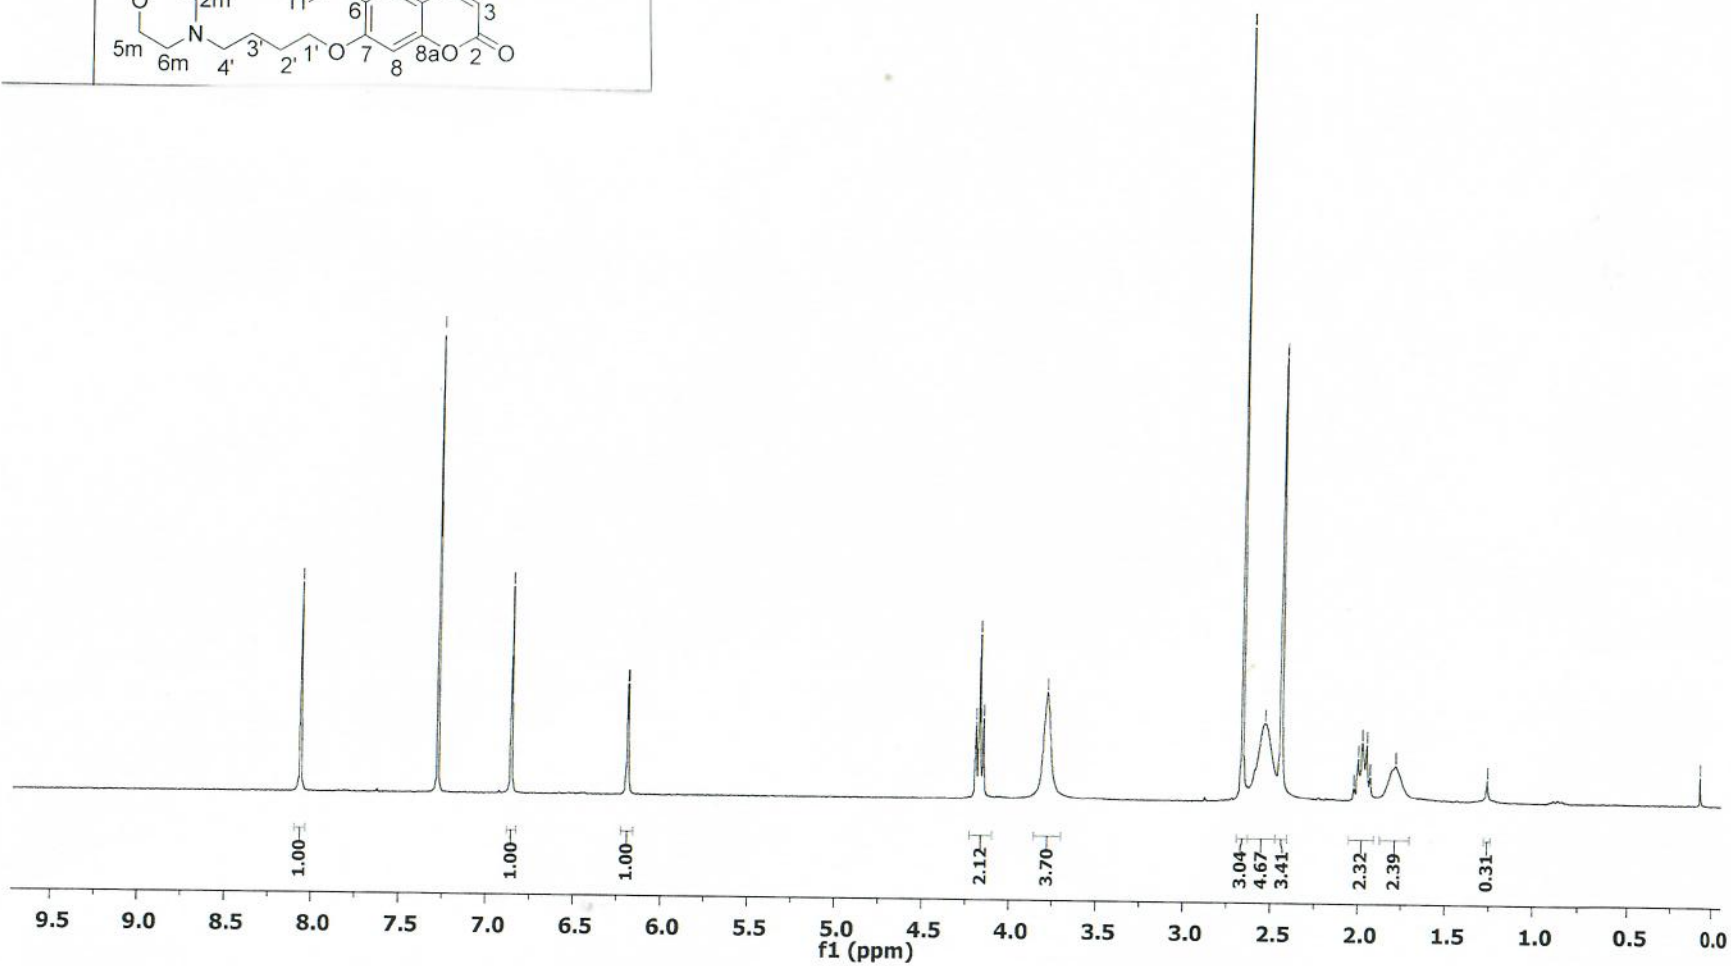

KO-520-III-13C

— 197.82

— 161.15  
— 160.56  
— 157.72  
— 152.98

— 128.13  
— 125.05

— 113.56  
— 113.01

— 100.56

— 77.65  
— 77.23  
— 76.81

— 69.25  
— 66.52  
— 66.38

— 58.40  
— 53.55

— 32.29  
— 26.93  
— 22.77  
— 18.93

13

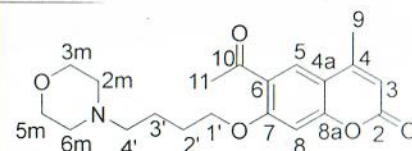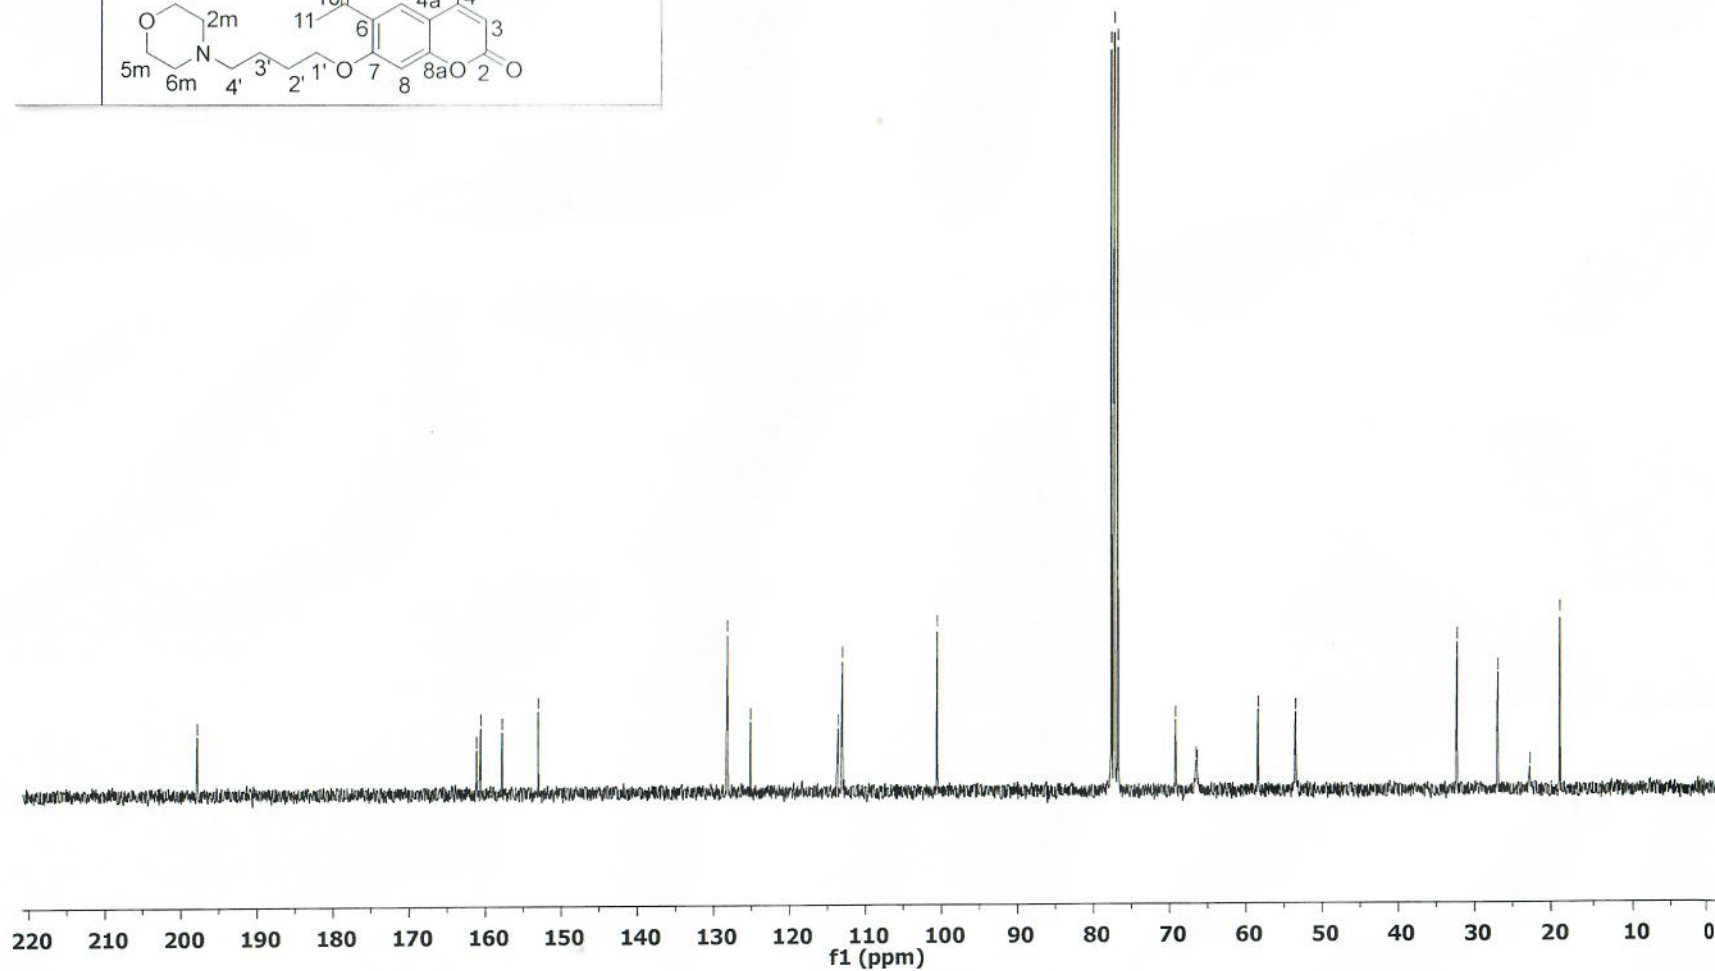

KO-517

8.21  
8.19  
8.07

7.28

6.88  
6.84  
6.81

6.20

4.22  
4.20  
4.18

3.78  
3.61  
3.59  
3.58

2.68  
2.66  
2.64  
2.63  
2.56  
2.53  
2.51  
2.46  
2.45

2.03  
2.00  
1.98  
1.96  
1.82  
1.80  
1.77  
1.75

0.89  
0.87  
0.84

0.08

14

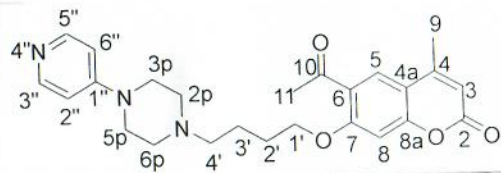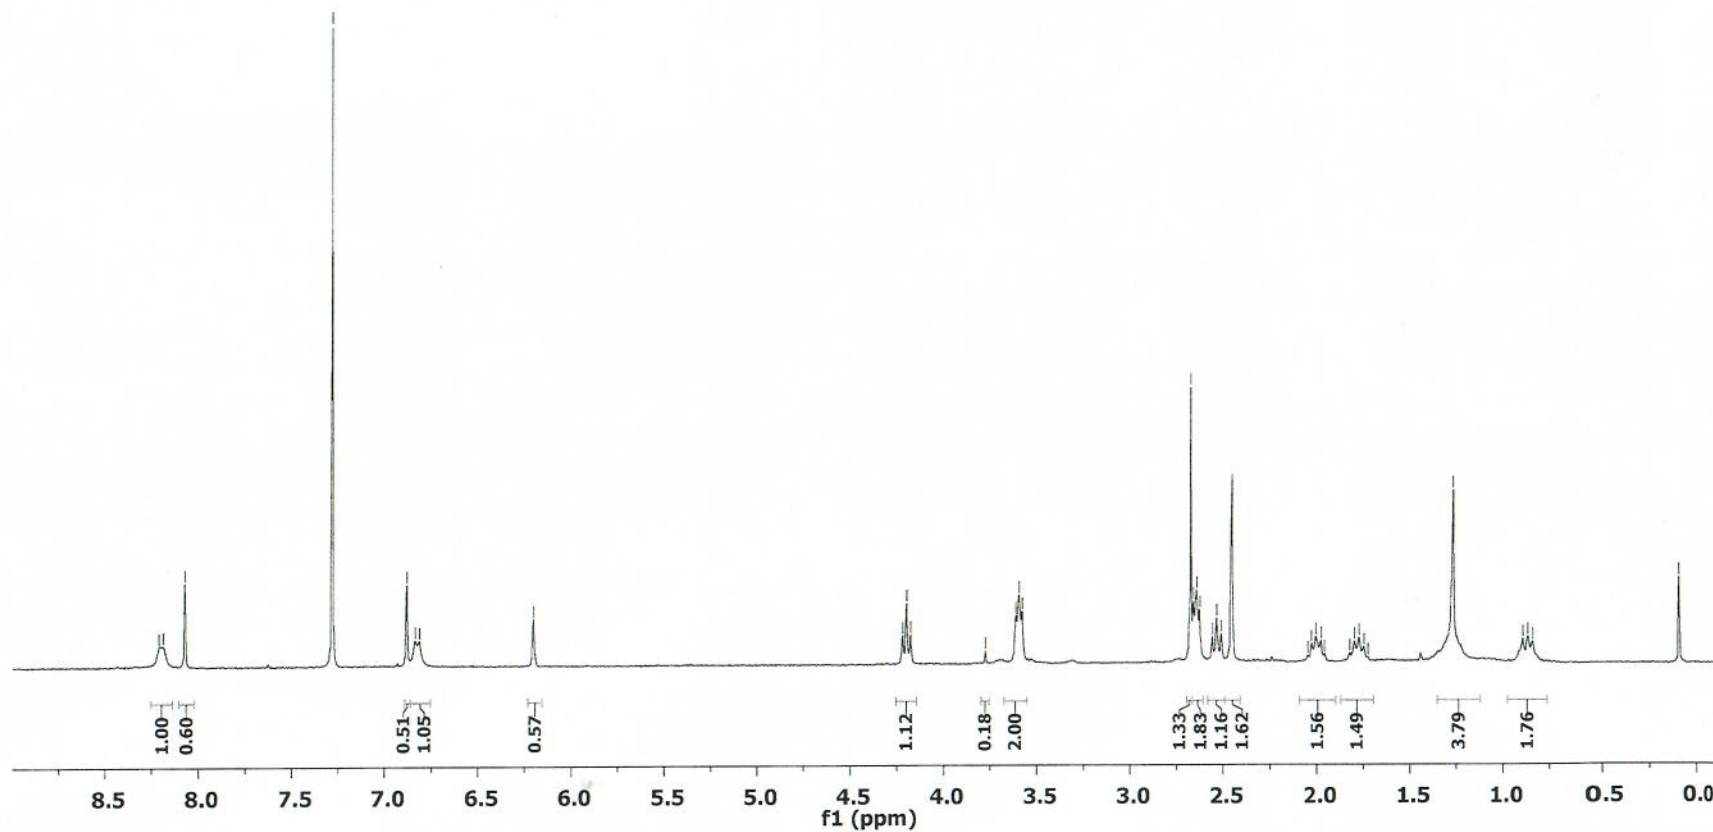

KO-517-13C

— 197.87

161.16  
160.56  
157.75  
156.45  
153.02

— 143.14

— 128.18  
— 125.13

113.62  
113.05  
107.64

— 100.56

77.65  
77.23  
76.81

— 69.28

— 57.76

— 52.54

— 46.26

32.29  
29.92  
26.92  
23.52  
18.95

14

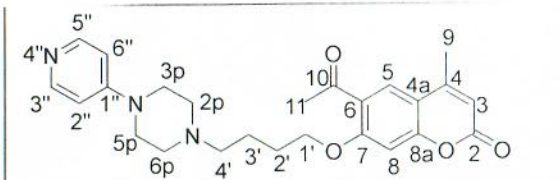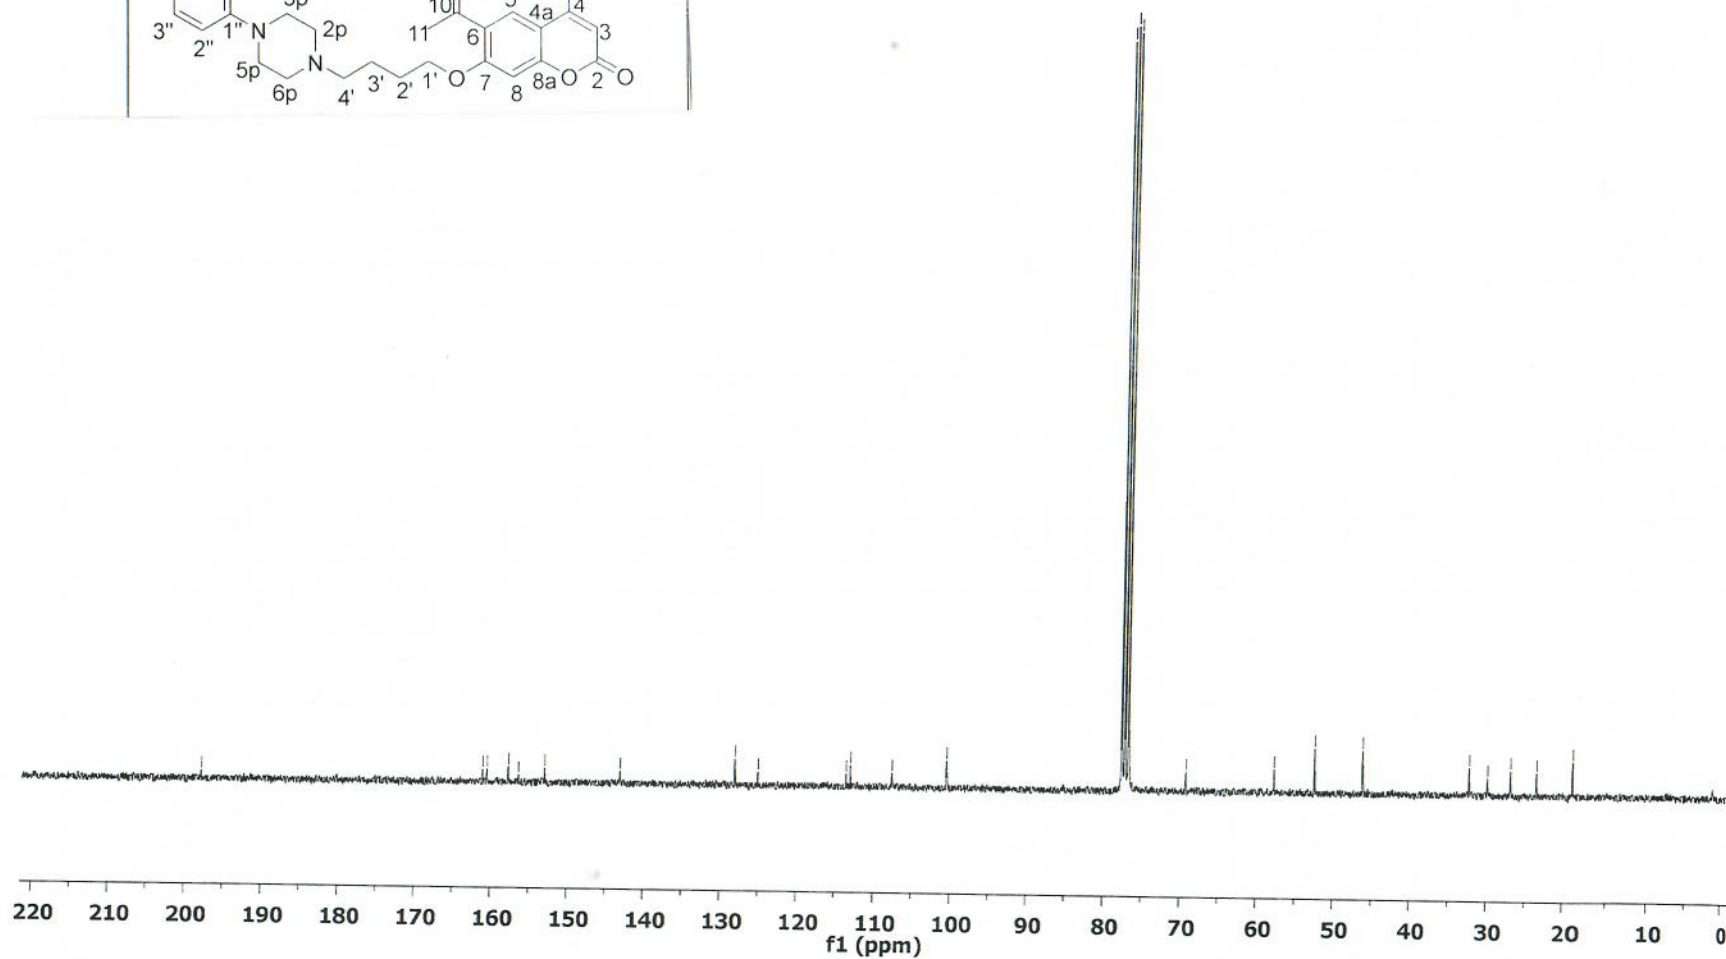

KO-521C-1H

8.16  
8.15  
8.08  
8.07  
8.07  
8.06  
7.87  
7.86

7.28

6.86

6.18  
6.18

4.21  
4.19  
4.17

3.66

2.67  
2.63  
2.55  
2.44  
2.44

2.18  
2.02  
2.00  
1.97  
1.95  
1.83  
1.81  
1.79

0.08

15

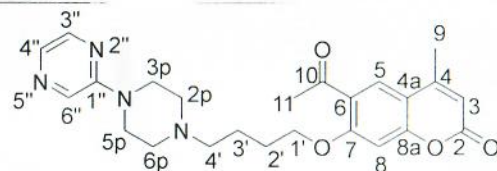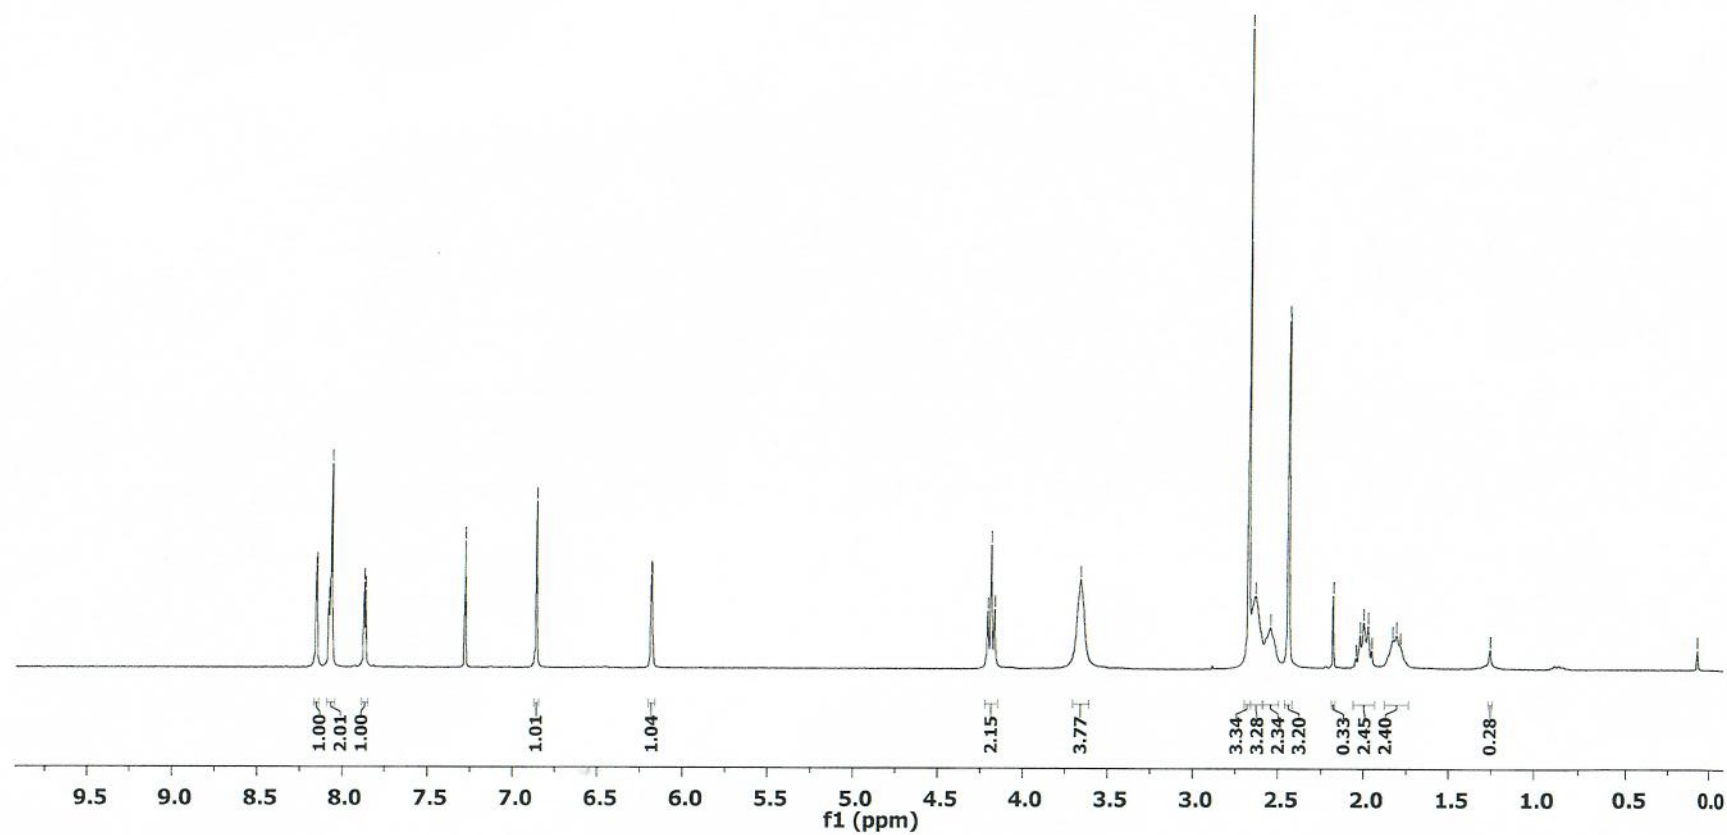



KO-521C-13C

— 197.83

161.27  
160.56  
157.74  
155.11  
153.01

— 141.91

133.23  
131.23  
128.16  
125.03

113.53  
112.96

— 100.54

77.65  
77.23  
76.81

— 69.40

— 58.17

— 52.96

— 44.56

32.33  
27.07  
23.55  
18.92

15

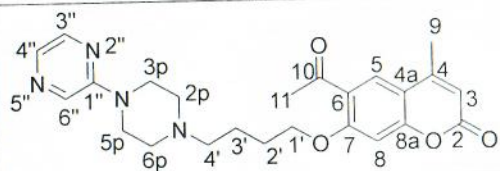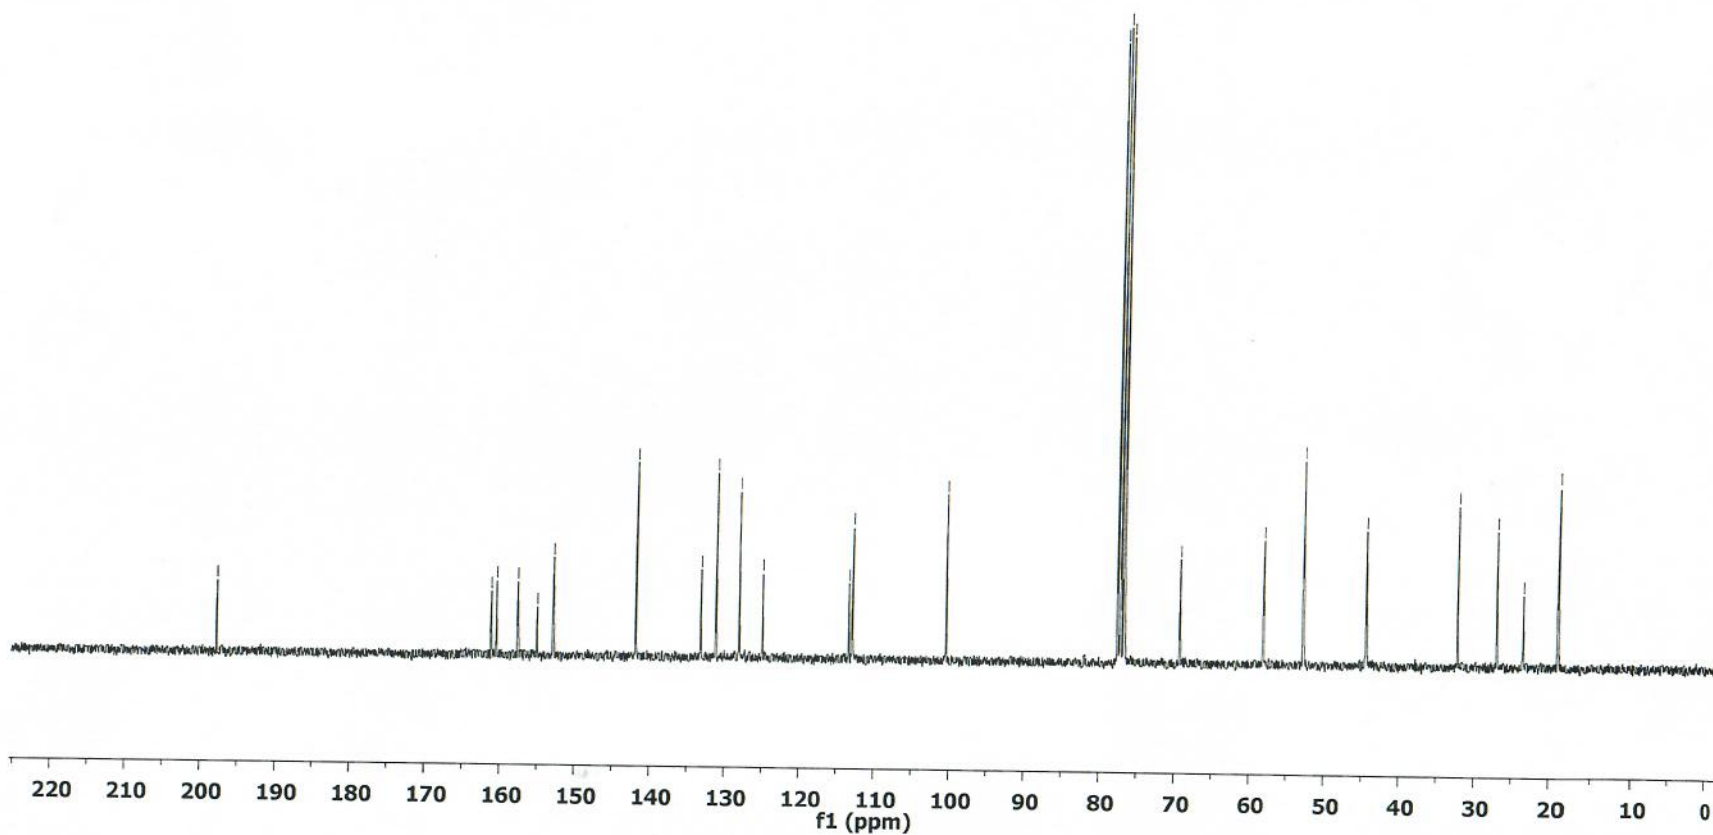

Supplement: s1 [file s1]
